# Supplementary material
Source: PubMed Central journal article supplement (PMC7988025)
Supplement: 40203_2021_86_MOESM1_ESM.pdf [file 40203_2021_86_MOESM1_ESM.pdf]

# **Optimizing Bedaquiline for Cardiotoxicity by Structure Based Virtual Screening, DFT analysis and Molecular Dynamic Simulation Studies to Identify Selective MDR-TB Inhibitors**

Iqrar Ahmad, Harsha Jadhav, Yashodeep Shinde, Vilas Jagtap, Rukaiyya Girase, Harun Patel\*  
*Division of Computer Aided Drug Design, Department of Pharmaceutical Chemistry, R. C. Patel  
Institute of Pharmaceutical Education and Research, Shirpur (Dhule)-425405, Maharashtra, India*

---

---

**Corresponding Author\***

Tel.: +91-8806621544; Fax: +91-(02563)251808

Email: [hpatel\\_38@yahoo.com](mailto:hpatel_38@yahoo.com)

---

# Index

| <b>Title</b>    | <b>Page No</b> |
|-----------------|----------------|
| Figure S1       | 3-20           |
| Table S1        | 21             |
| Table S2        | 22             |
| TableS3         | 23             |
| Table S4        | 25             |
| Novelity Report | 30             |

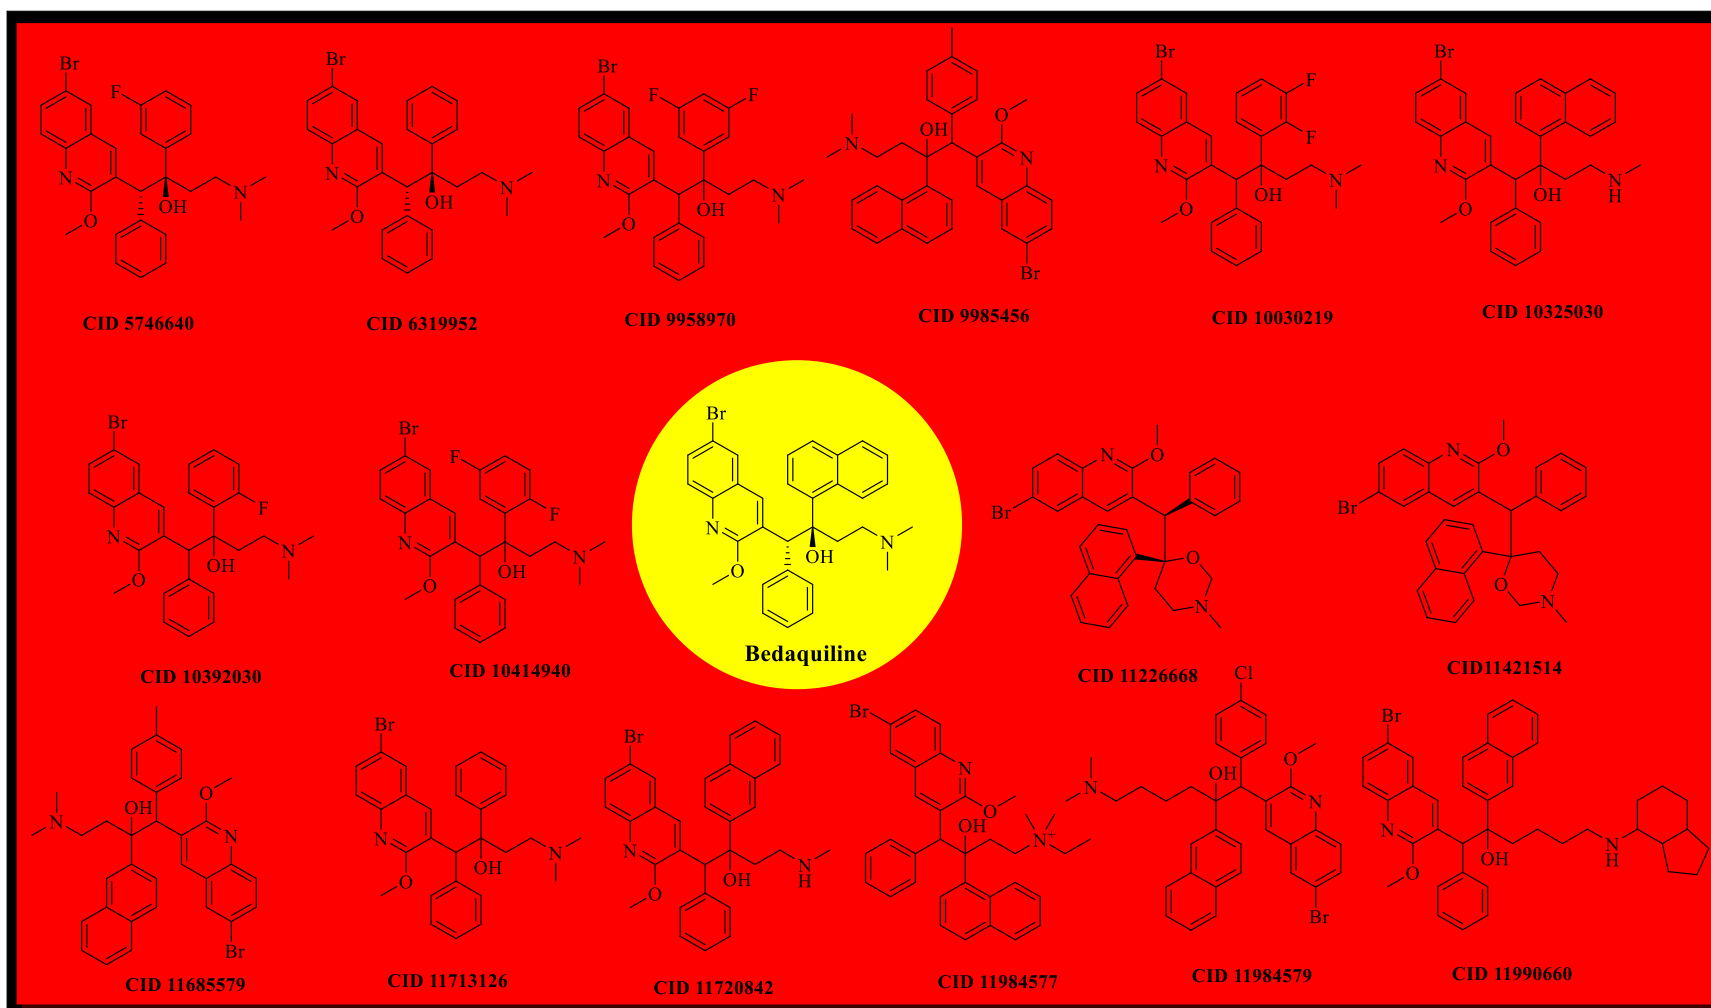

**Figure S1.** Library of Bedaquiline analogues obtained from Pubchem database

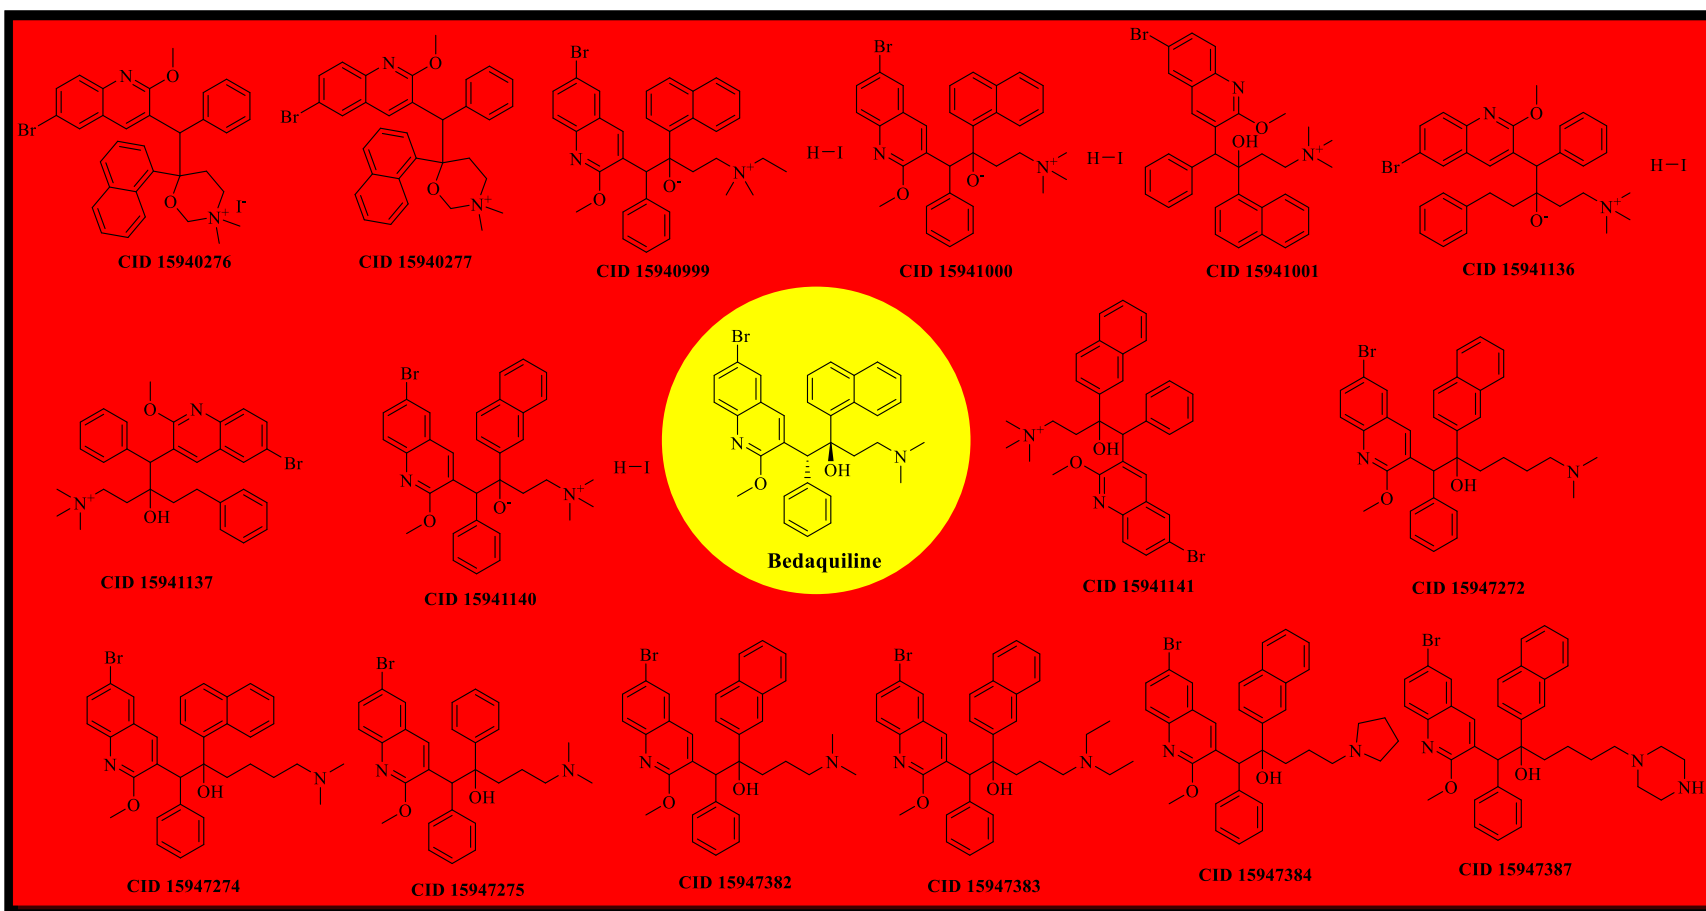

Figure S1. Continue...

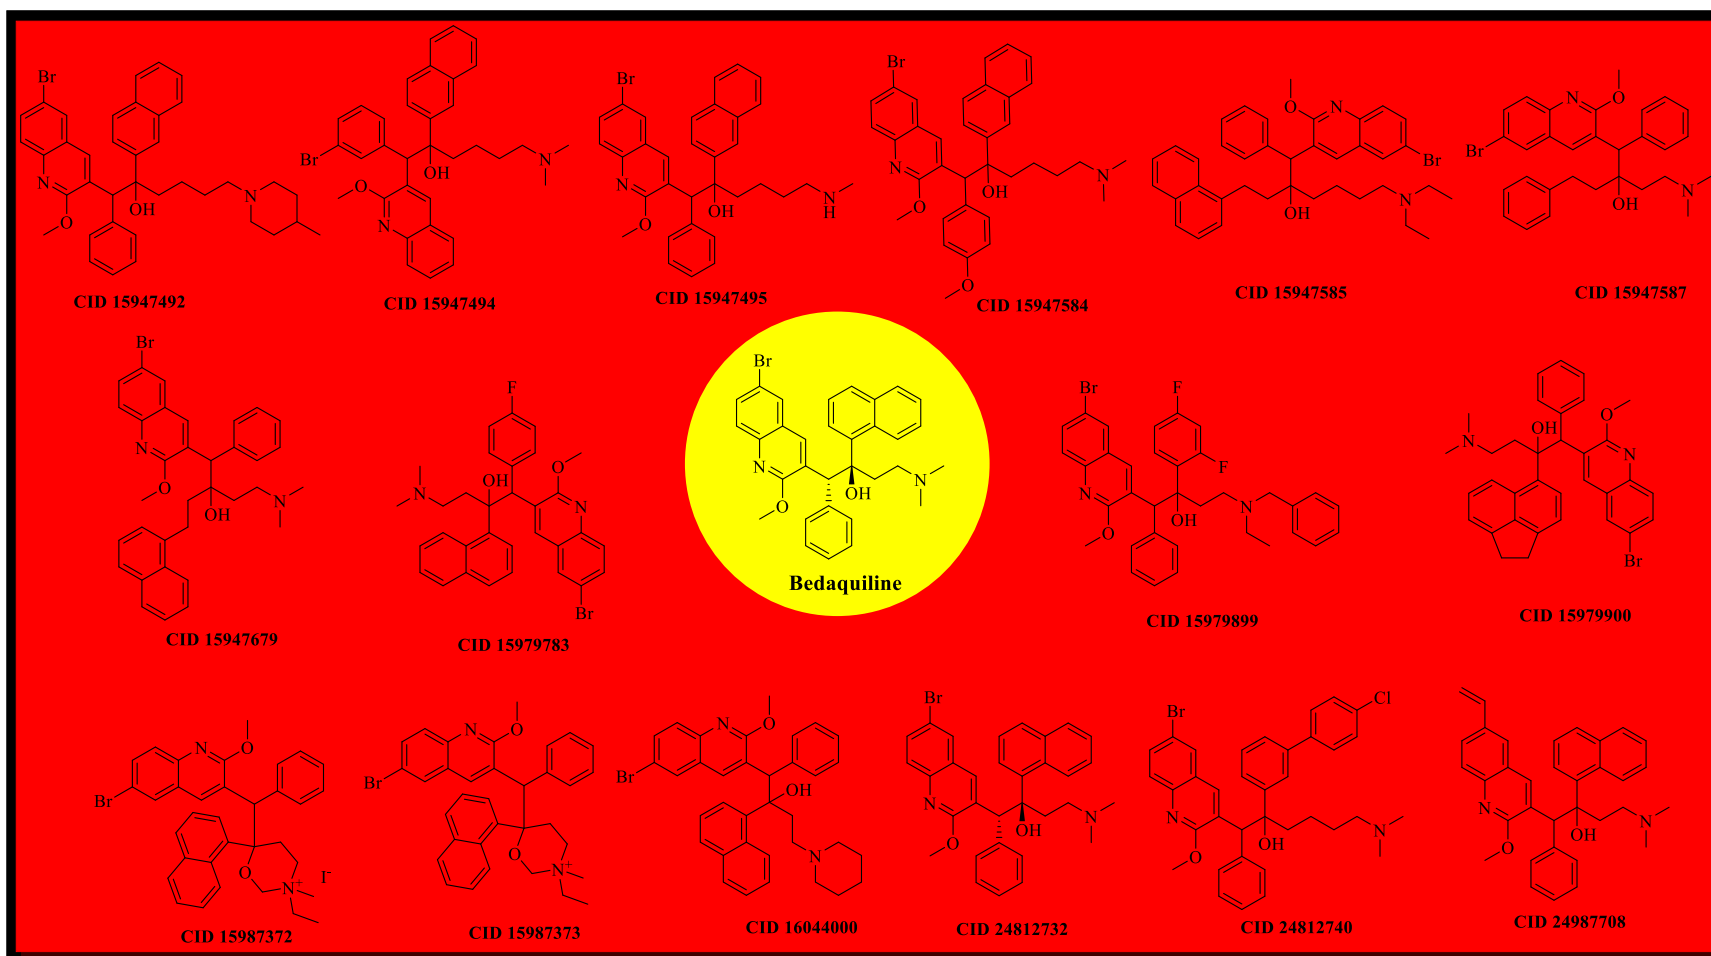

Figure S1. *Continue...*

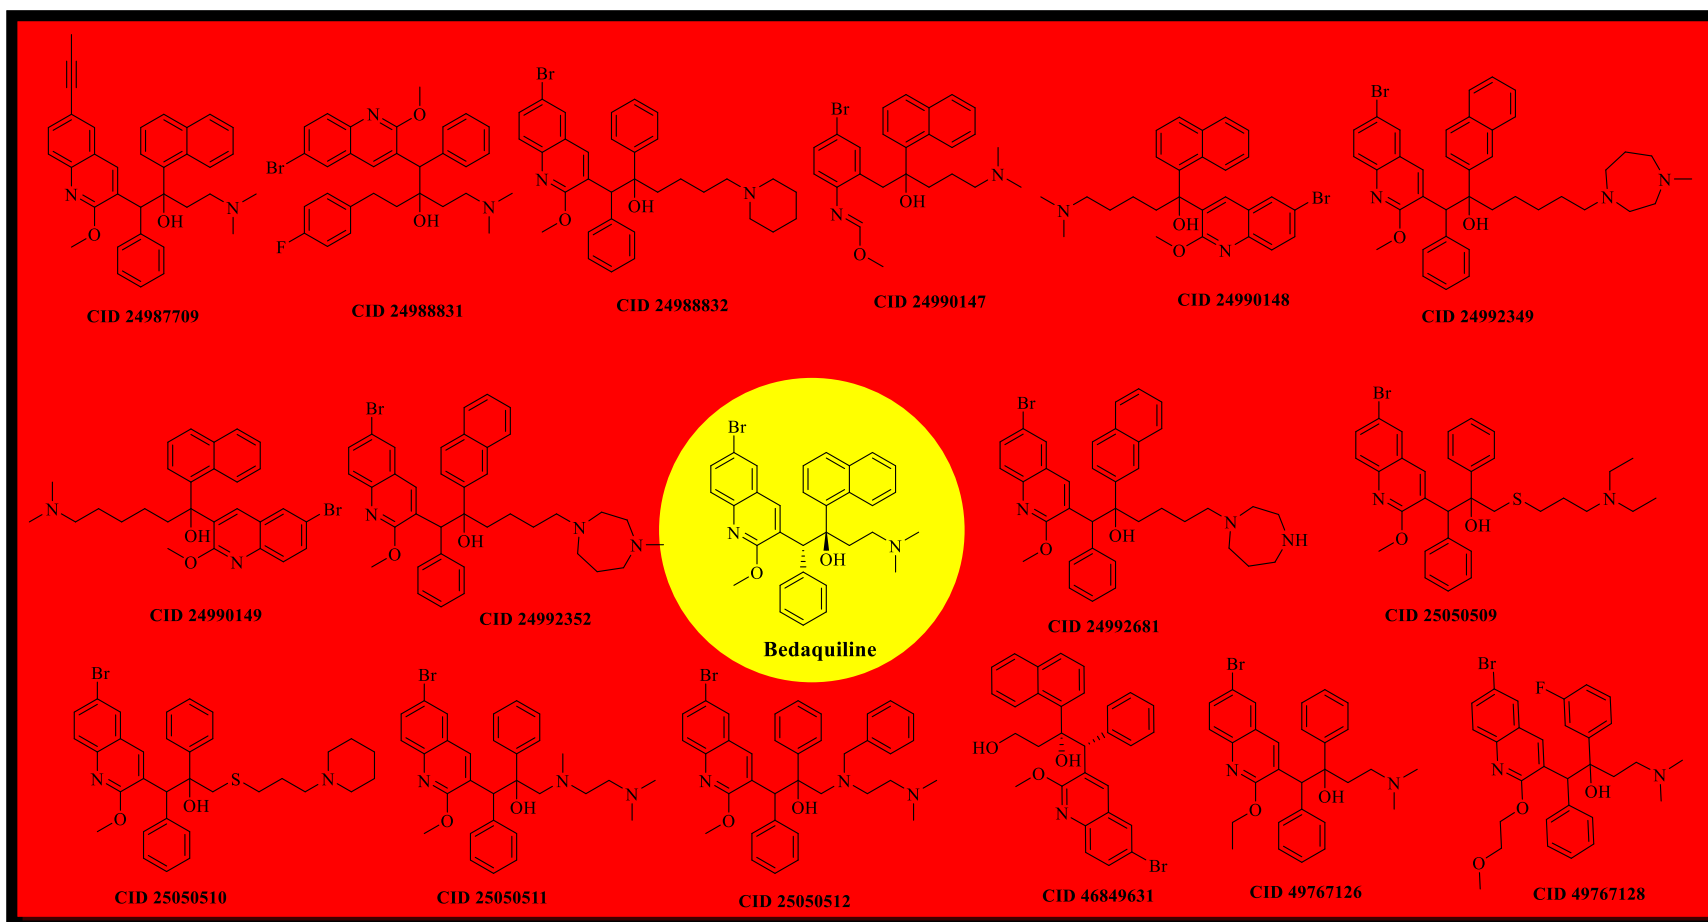

Figure S1. Continue...

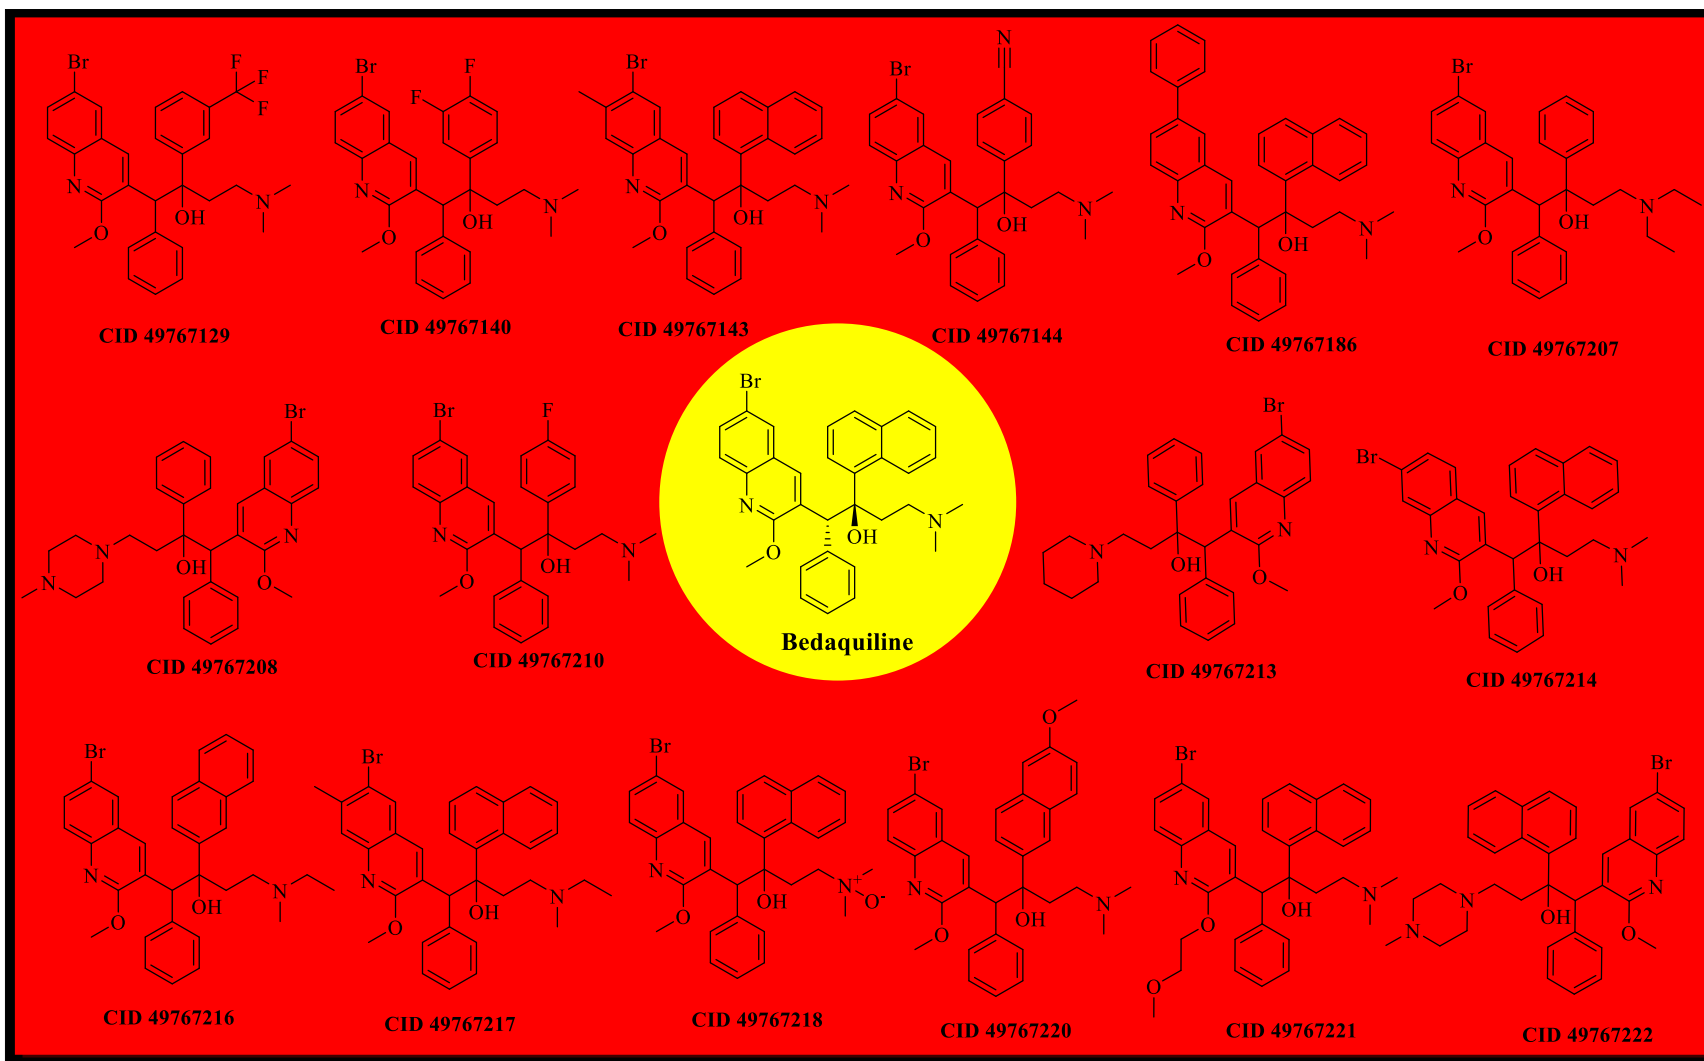

Figure S1. Continue...

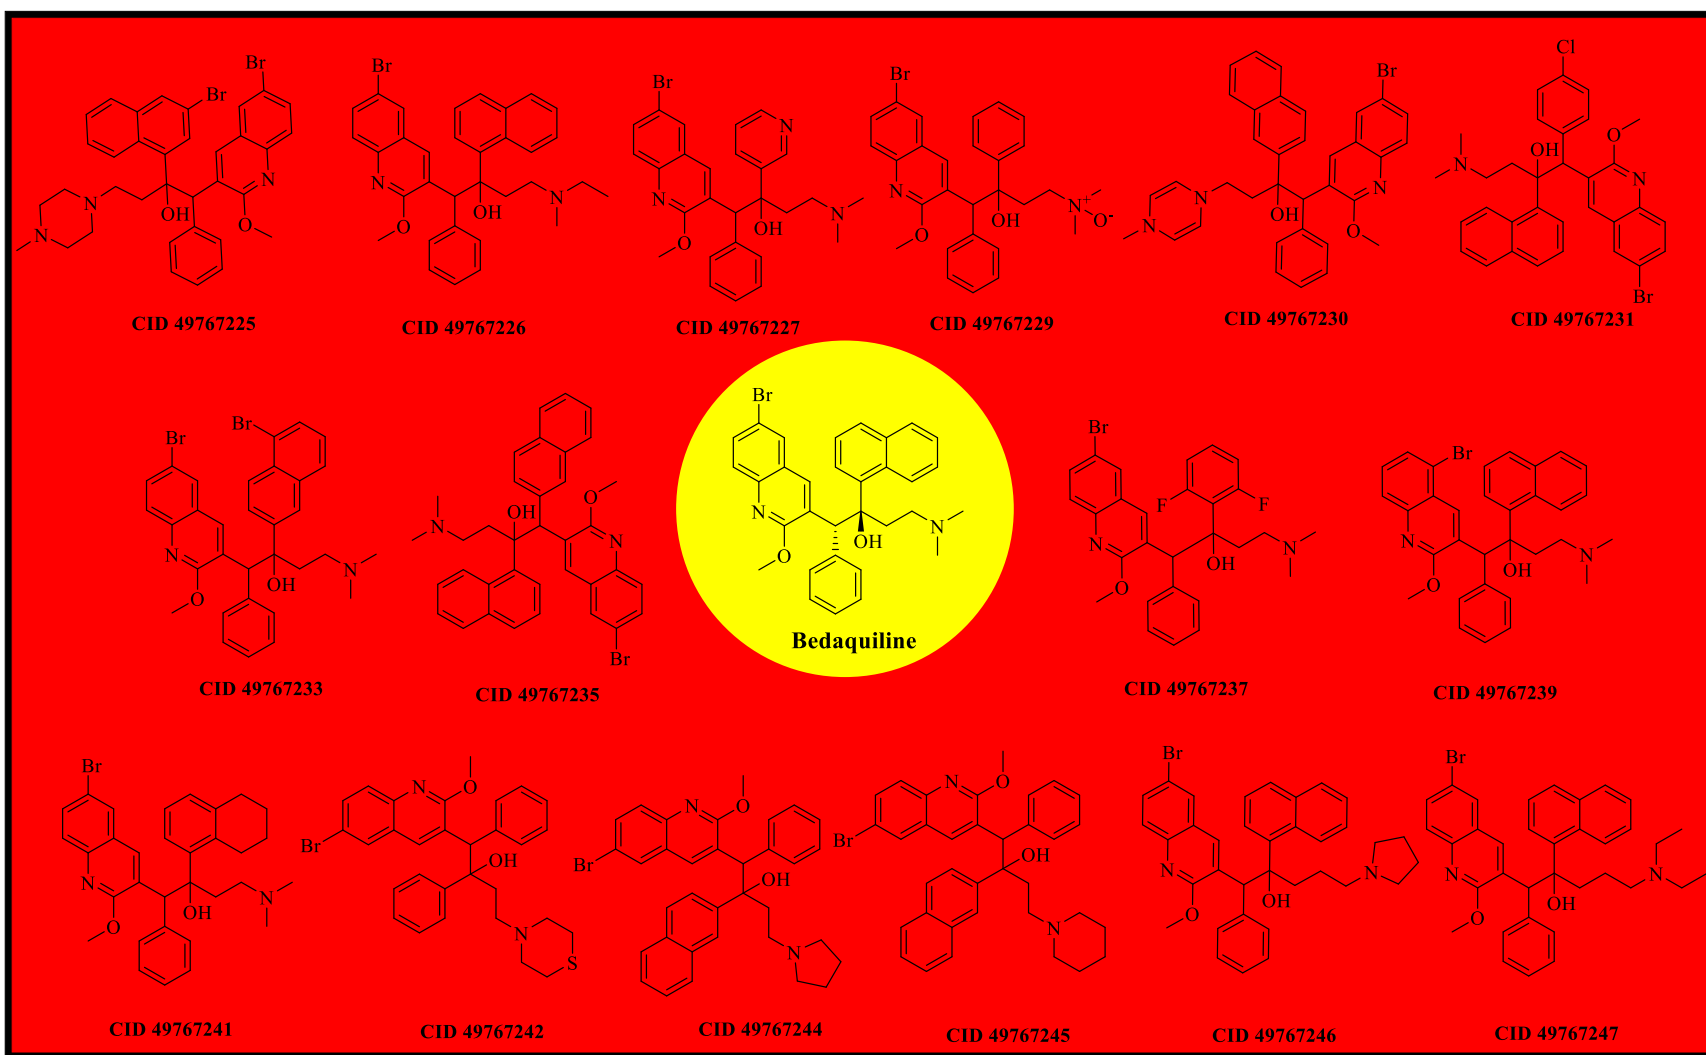

Figure S1. Continue...



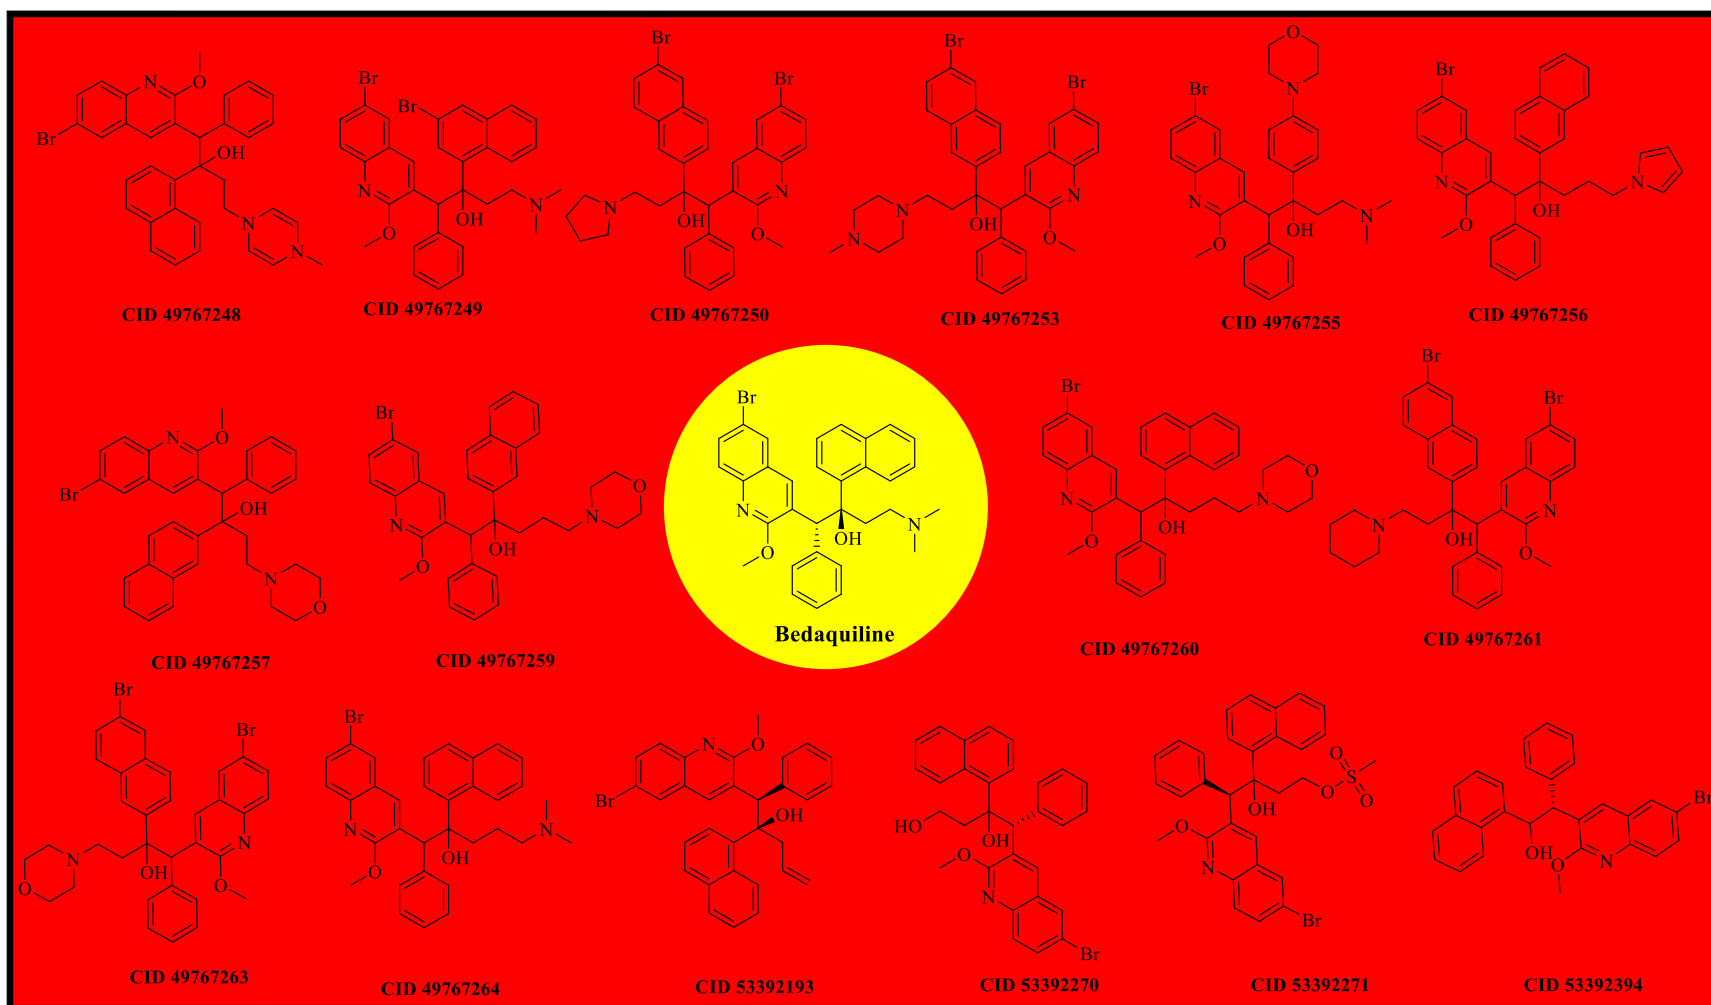

Figure S1. Continue...

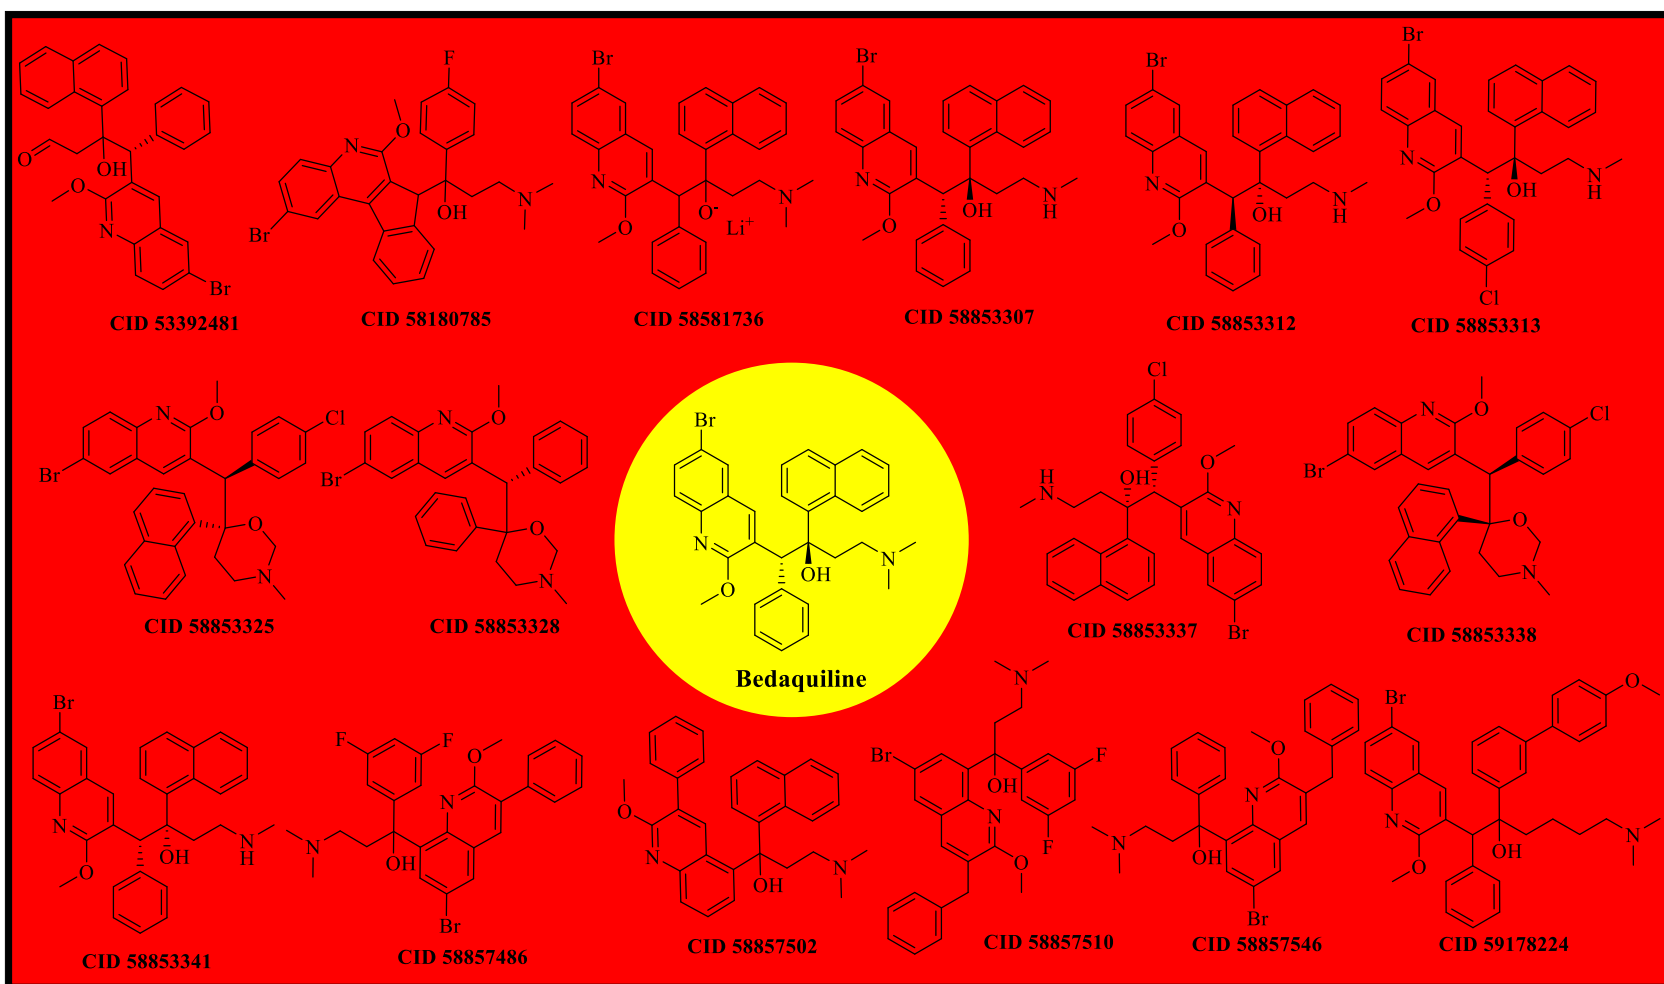

Figure S1. Continue...

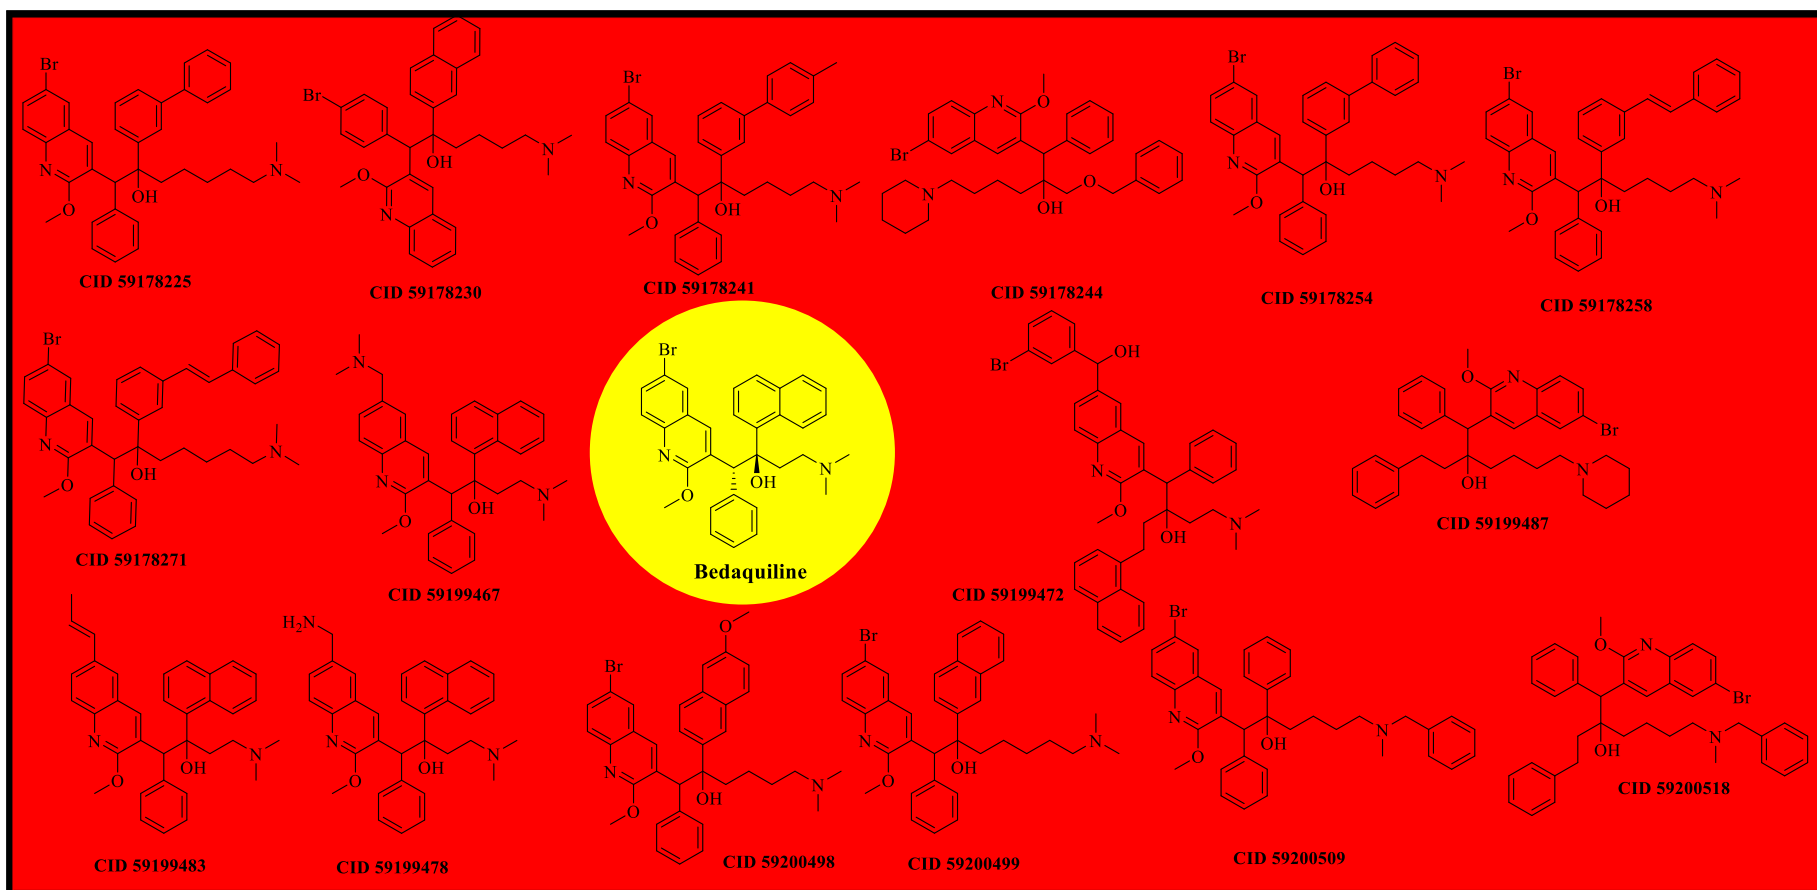

Figure S1. Continue...

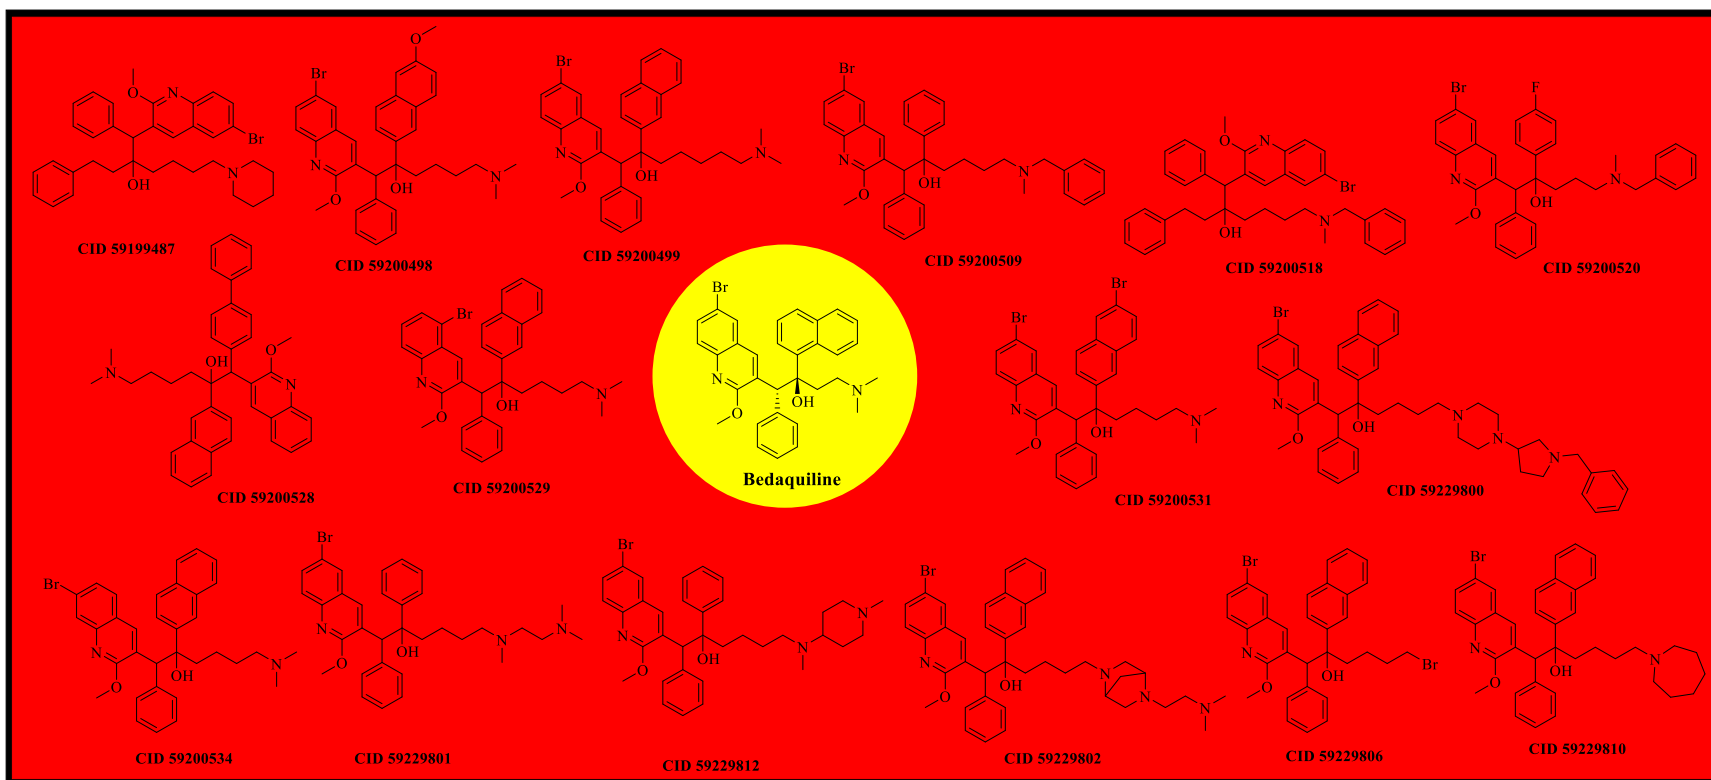

**Figure S1.** *Continue...*

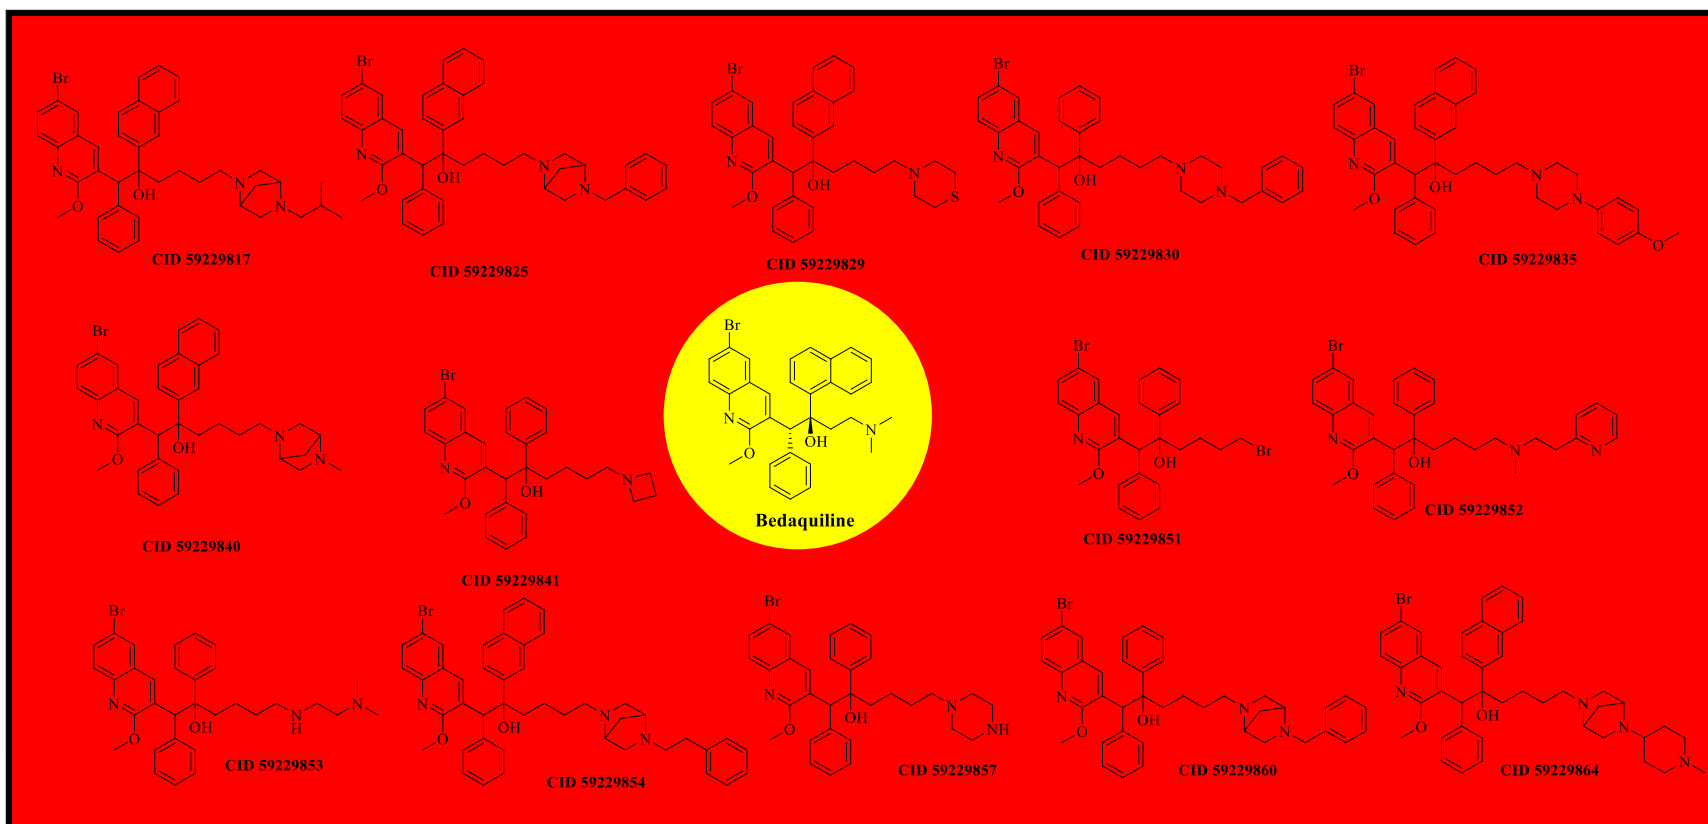

Figure S1. *Continue...*

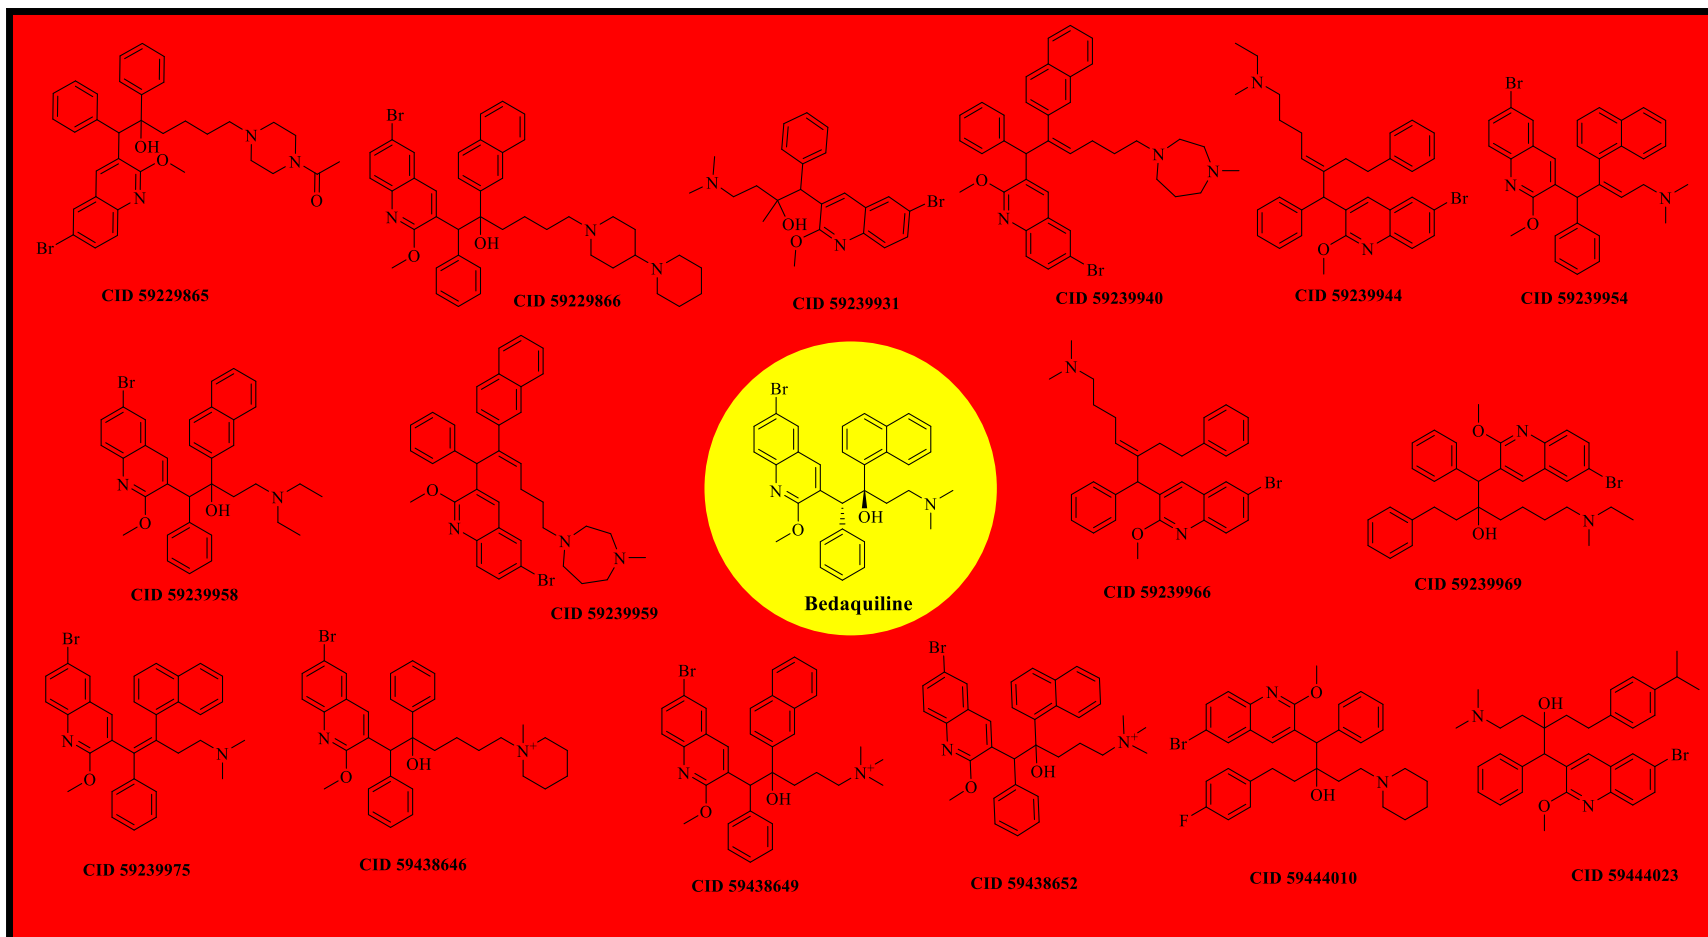

Figure S1. Continue...

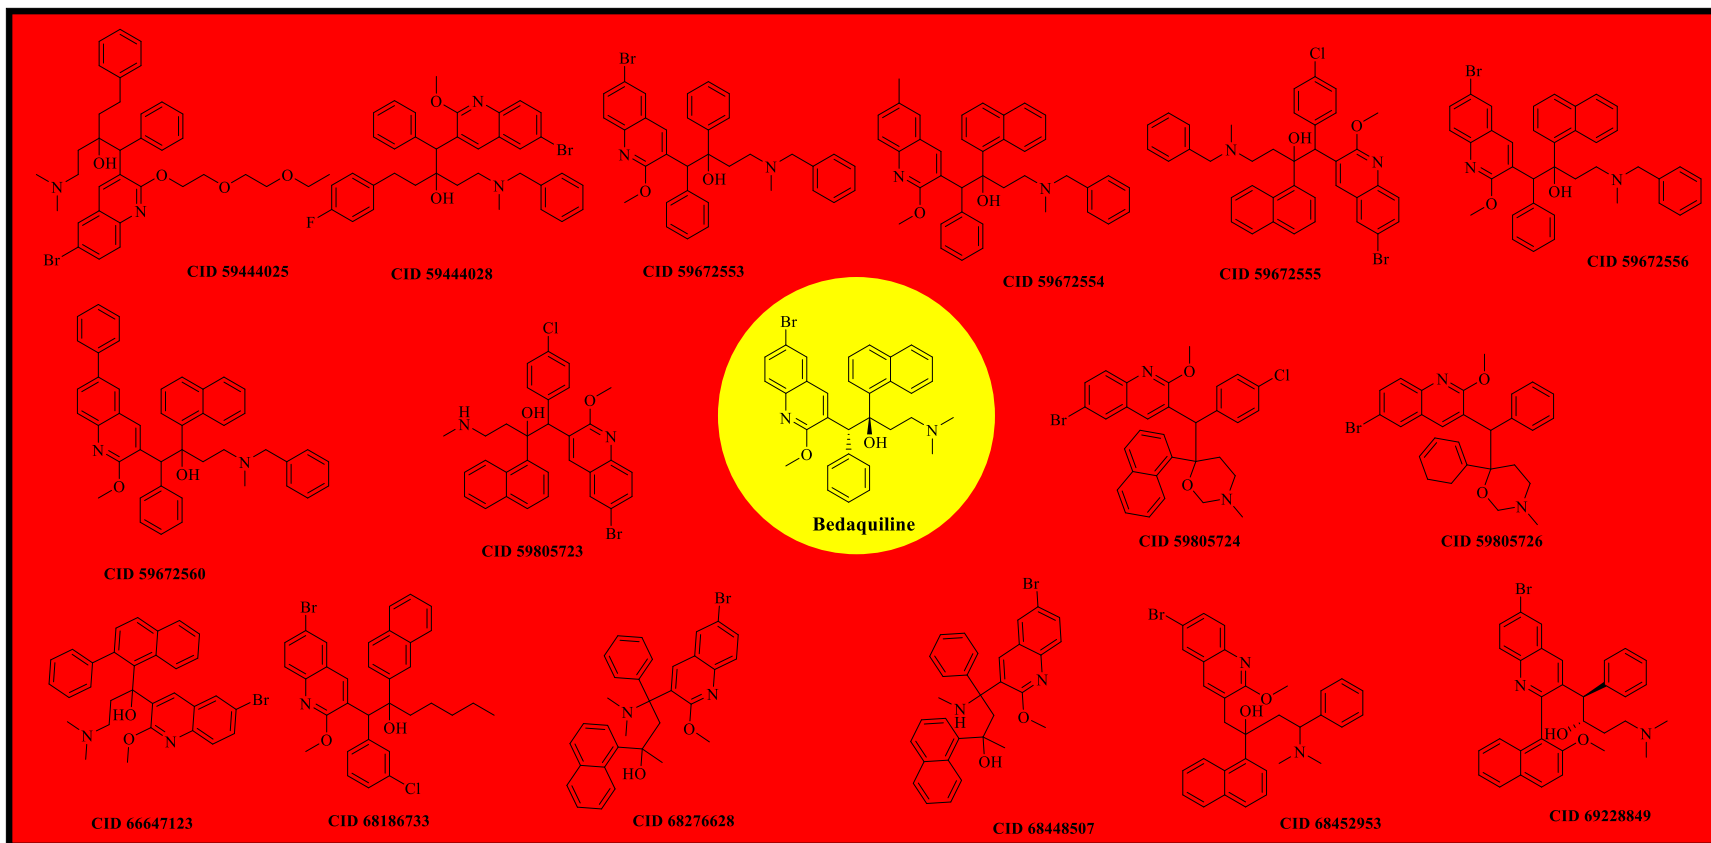

Figure S1. Continue...

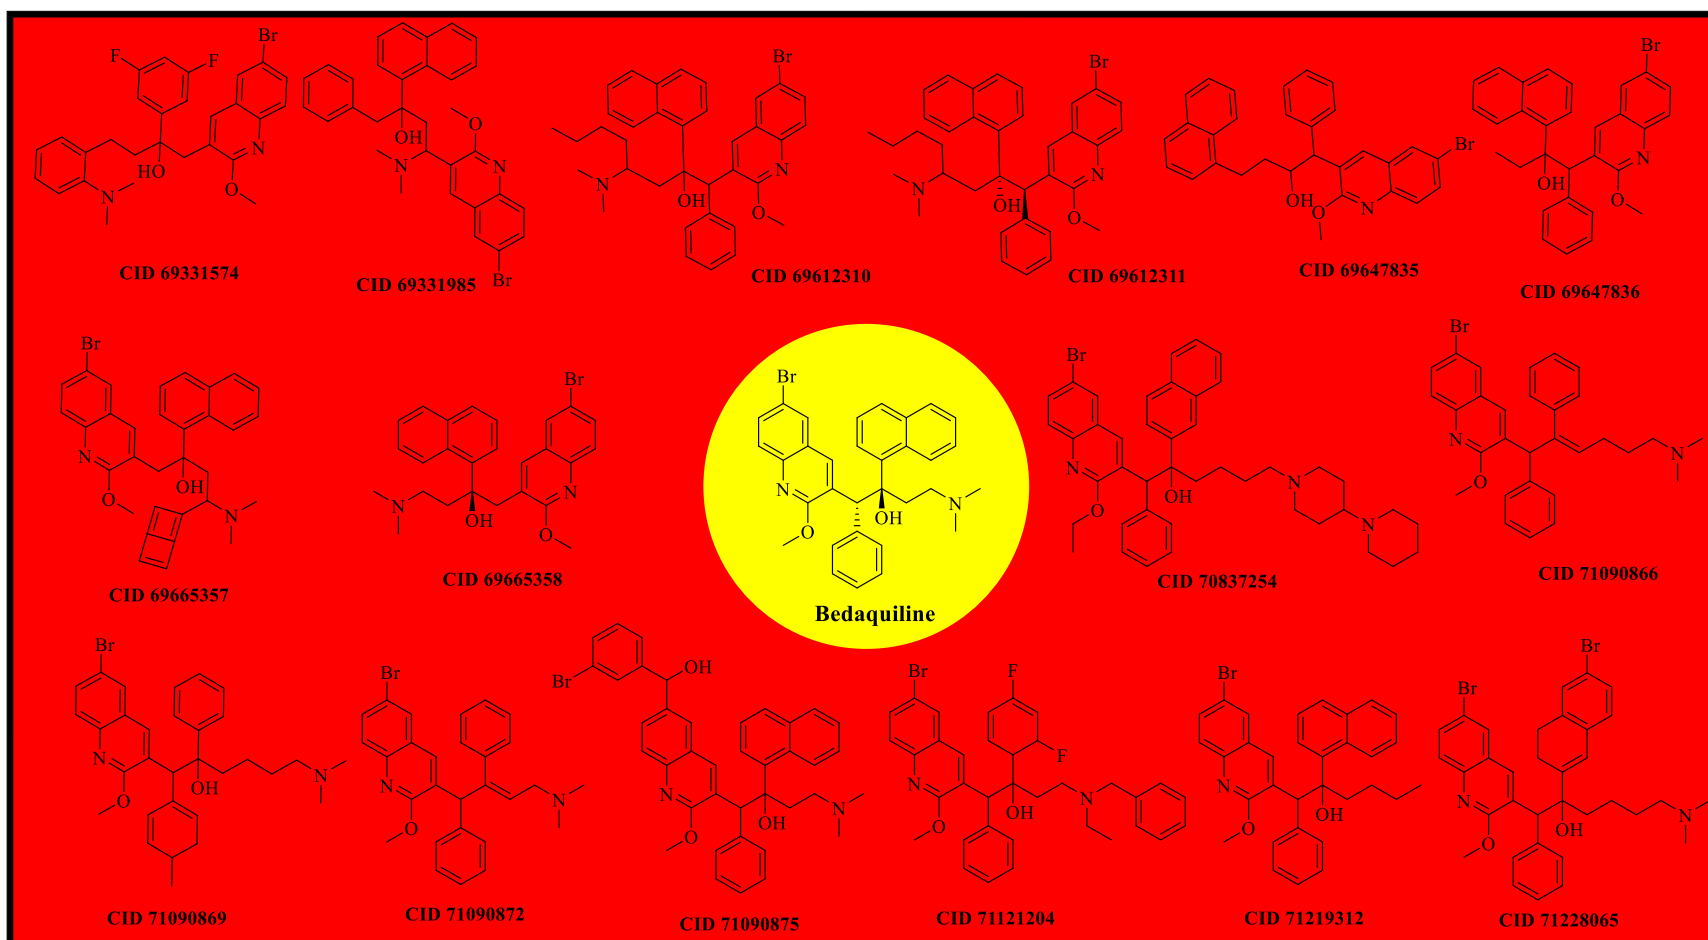

Figure S1. *Continue...*



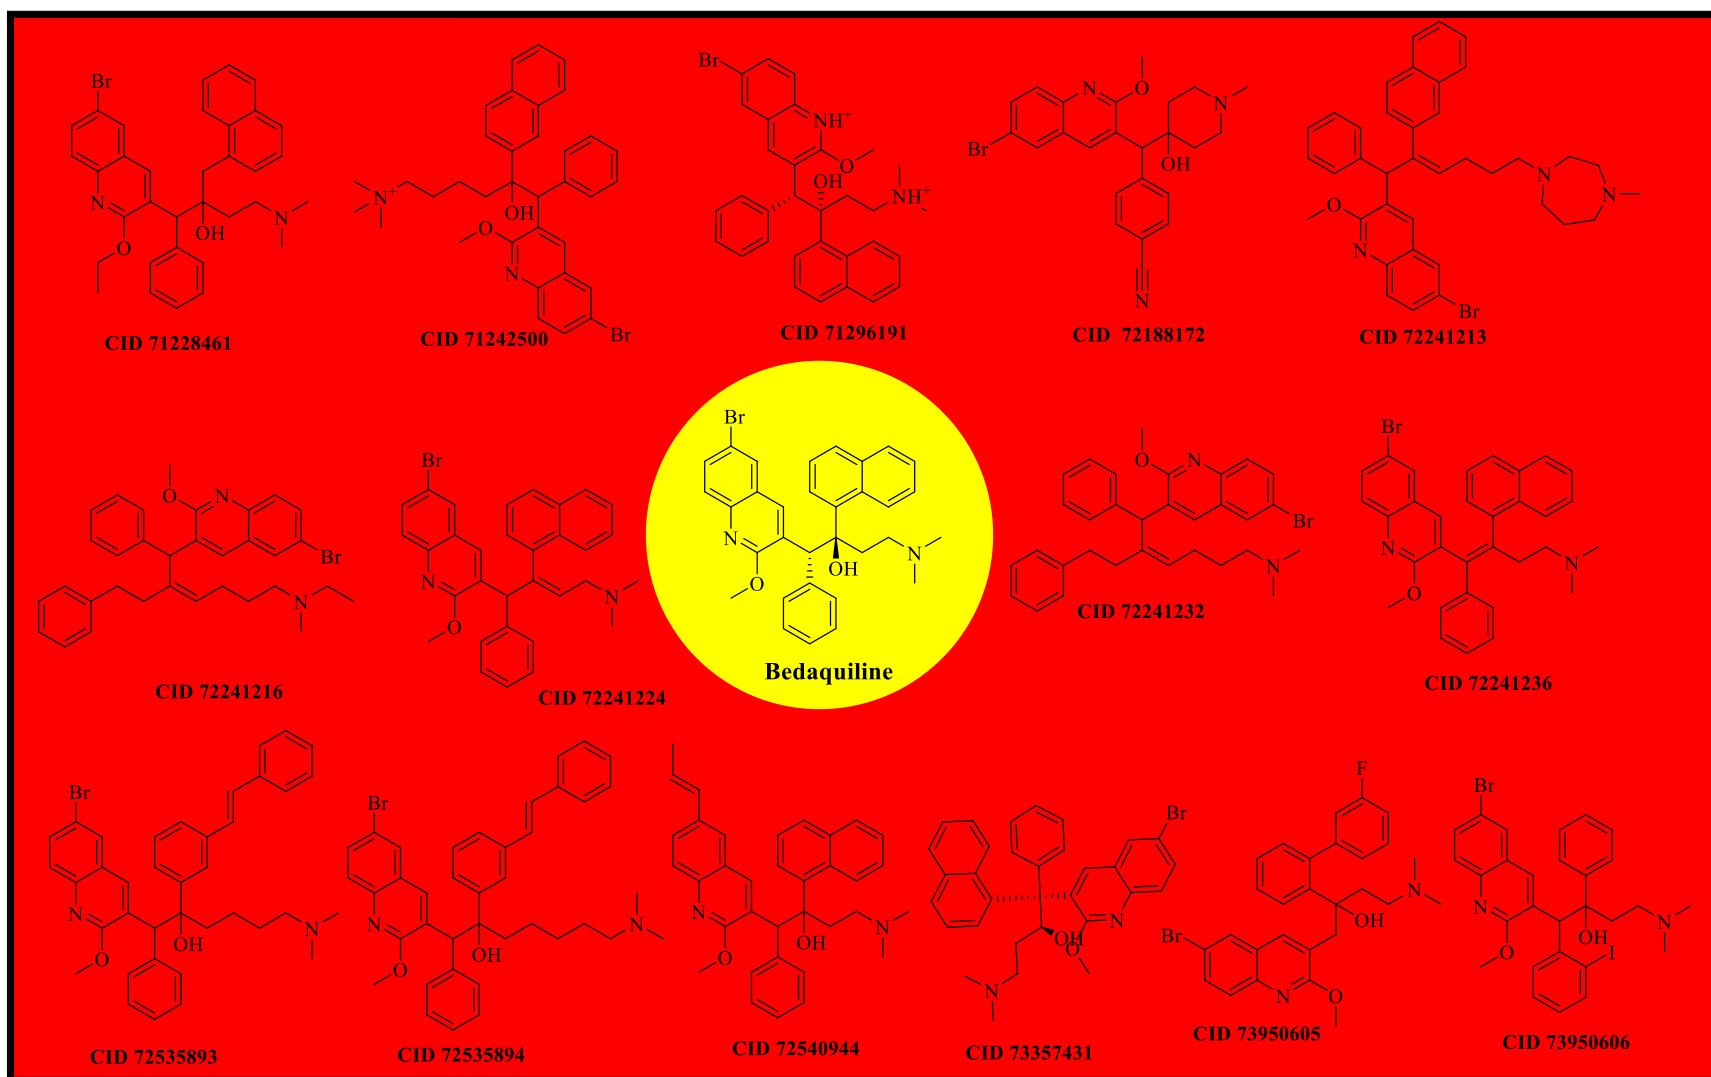

Figure S1. Continue...

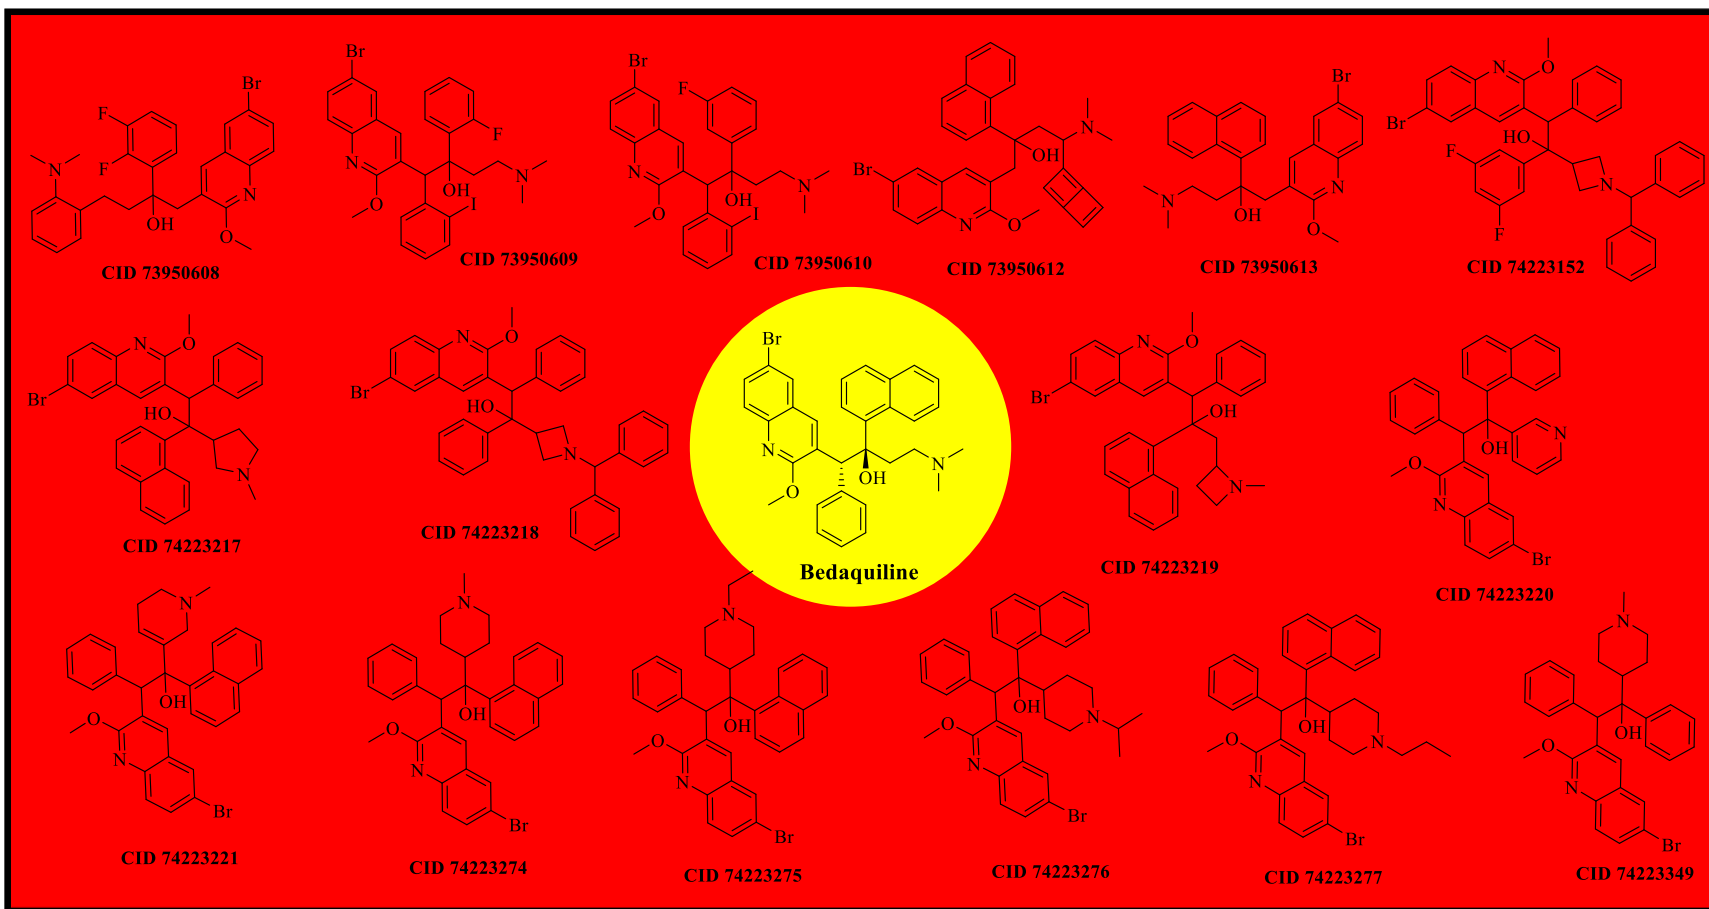

Figure S1. Continue...

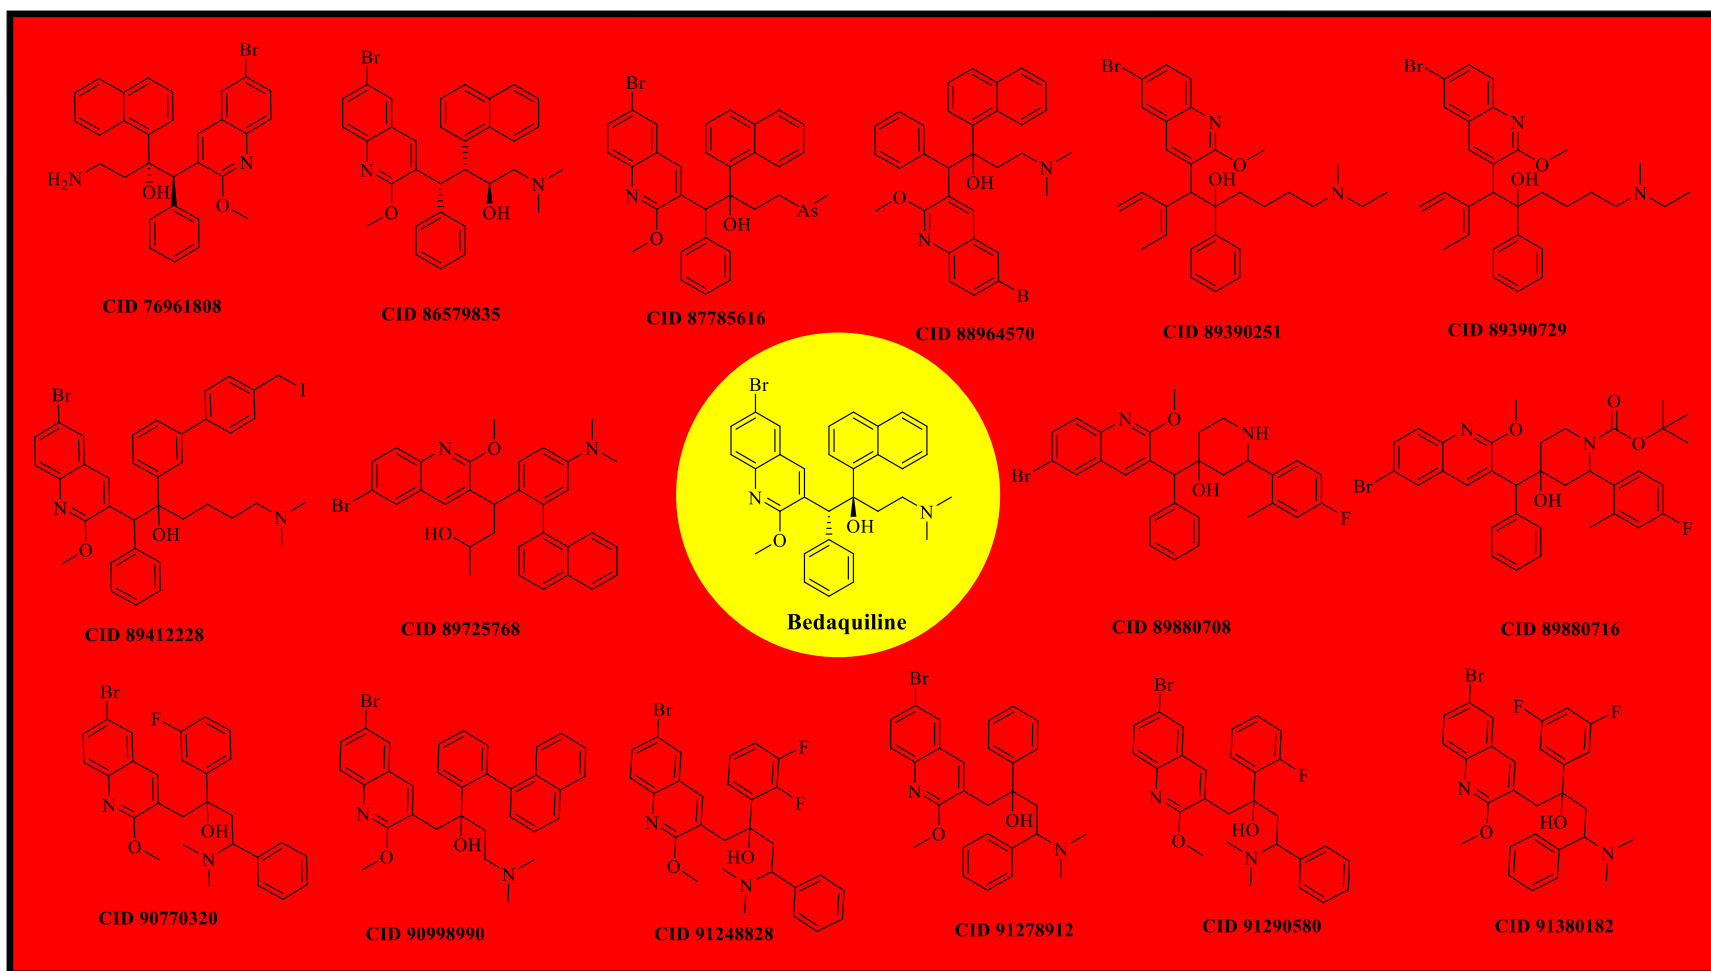

Figure S1. Continue...

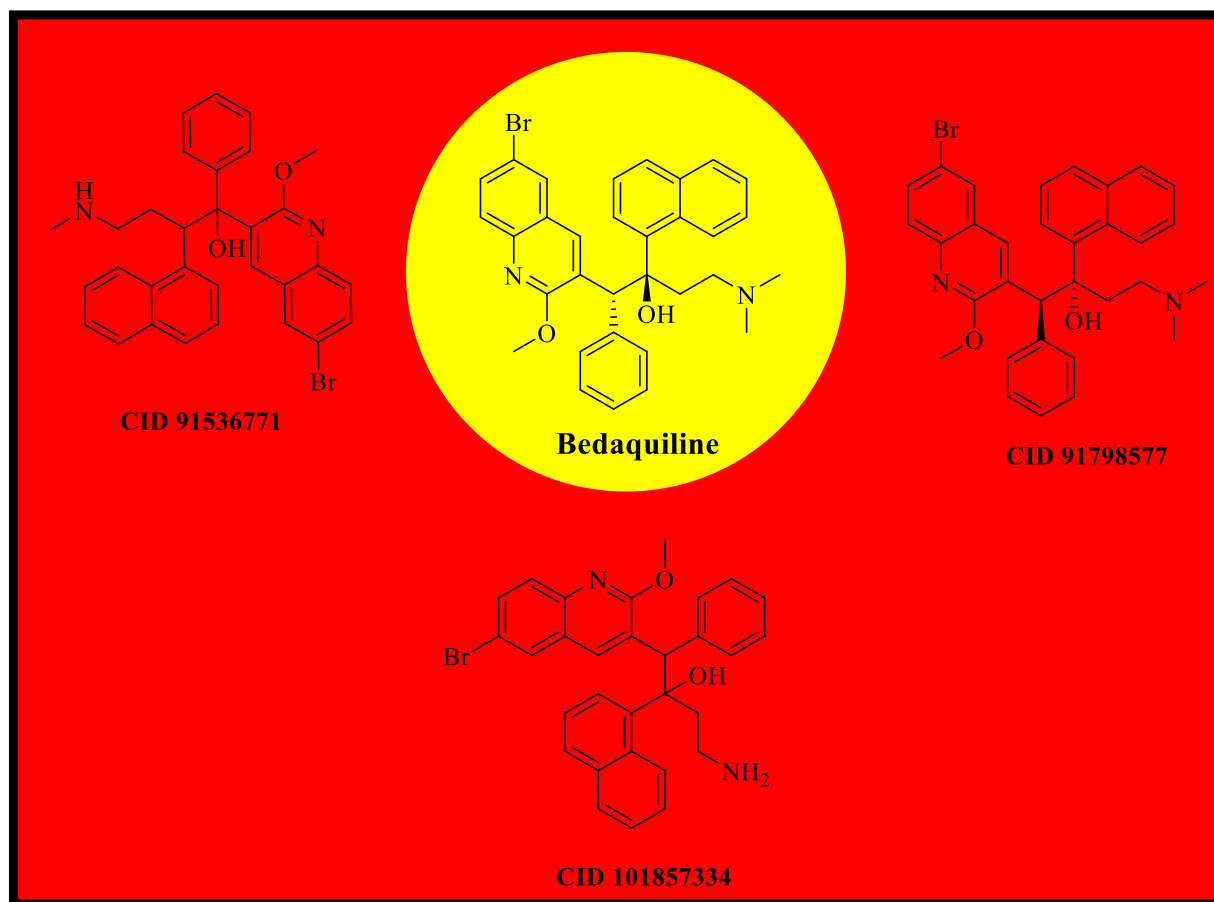

**Figure S1.** *Continue...*

**Table S1.** Bedaquiline analogues hERG inhibition (QPlogHERG) predicted by QikProp, Schrodinger 9.0.

| CID Code           | QPlogHERG     | Source File | QPlogHERG | CID Code | QPlogHERG | CID Code | QPlogHERG |
|--------------------|---------------|-------------|-----------|----------|-----------|----------|-----------|
| <b>Bedaquiline</b> | <b>-7.806</b> | 74223220    | -7.729    | 68452953 | -7.543    | 49767241 | -7.258    |
| 15979899           | -7.799        | 10325030    | -7.727    | 49767126 | -7.539    | 73950610 | -7.258    |
| 68276628           | -7.799        | 15947274    | -7.727    | 59200520 | -7.538    | 74223219 | -7.25     |
| 66647123           | -7.795        | 59672553    | -7.727    | 49767218 | -7.537    | 49767260 | -7.247    |
| 24988831           | -7.794        | 91278912    | -7.724    | 49767210 | -7.527    | 73950609 | -7.246    |
| 59229857           | -7.793        | 69612311    | -7.723    | 49767248 | -7.523    | 58857486 | -7.218    |
| 71121204           | -7.793        | 58857502    | -7.717    | 5746640  | -7.521    | 58581736 | -7.201    |
| 59239975           | -7.792        | 49767207    | -7.714    | 15947382 | -7.515    | 91798577 | -7.201    |
| 72241236           | -7.792        | 24990149    | -7.702    | 89390251 | -7.506    | 49767214 | -7.171    |
| 71090872           | -7.791        | 71090869    | -7.698    | 24990148 | -7.498    | 59229865 | -7.136    |
| 49767231           | -7.788        | 71090875    | -7.692    | 89880716 | -7.497    | 74223349 | -7.115    |
| 59239954           | -7.786        | 49767213    | -7.69     | 58853328 | -7.489    | 69647836 | -7.114    |
| 72241224           | -7.786        | 58857546    | -7.69     | 58857510 | -7.489    | 59229852 | -7.108    |
| 49767221           | -7.784        | 89880708    | -7.685    | 49767227 | -7.485    | 9985456  | -7.093    |
| 15947587           | -7.779        | 59805723    | -7.675    | 49767129 | -7.472    | 53392193 | -7.069    |
| 58853337           | -7.779        | 59229806    | -7.672    | 69665357 | -7.465    | 53392481 | -7.057    |
| 59805724           | -7.775        | 72241216    | -7.664    | 73950612 | -7.465    | 49767229 | -7.042    |
| 86579835           | -7.774        | 74223274    | -7.662    | 59672555 | -7.458    | 49767258 | -7.027    |
| 89390729           | -7.774        | 49767239    | -7.656    | 25050509 | -7.456    | 46849631 | -7.02     |
| 91536771           | -7.772        | 24990147    | -7.652    | 49767237 | -7.456    | 53392270 | -7.02     |
| 74223221           | -7.771        | 15979900    | -7.649    | 59229829 | -7.445    | 58853338 | -7.003    |
| 49767257           | -7.77         | 58853325    | -7.638    | 73950613 | -7.445    | 53392394 | -6.985    |
| 49767256           | -7.767        | 49767249    | -7.636    | 90998990 | -7.428    | 59239931 | -6.869    |
| 11421514           | -7.764        | 25050510    | -7.628    | 91248828 | -7.419    | 69305090 | -6.837    |
| 74223275           | -7.762        | 11713126    | -7.614    | 49767140 | -7.418    | 69647835 | -6.795    |
| 49767143           | -7.761        | 6319952     | -7.608    | 9958970  | -7.402    | 69665358 | -6.369    |
| 15979783           | -7.76         | 90770320    | -7.606    | 49767128 | -7.389    |          |           |
| 69612310           | -7.759        | 59672556    | -7.605    | 73950606 | -7.374    |          |           |
| 73357431           | -7.759        | 91290580    | -7.597    | 53392271 | -7.341    |          |           |
| 11990660           | -7.747        | 71090866    | -7.596    | 69331985 | -7.338    |          |           |
| 74223217           | -7.747        | 73950605    | -7.584    | 59229841 | -7.313    |          |           |
| 101857334          | -7.743        | 74223276    | -7.564    | 71219312 | -7.305    |          |           |
| 76961808           | -7.743        | 59672554    | -7.559    | 10414940 | -7.301    |          |           |
| 49767263           | -7.737        | 49767217    | -7.555    | 10030219 | -7.294    |          |           |
| 15947275           | -7.733        | 91380182    | -7.555    | 11226668 | -7.27     |          |           |

**Table S2.** Lipophilicity/Partition coefficient (QPlogPo/w) of Bedaquiline analogues predicted by QikProp, Schrodinger 9.0.

| CID Code           | QPlogPo/w    | CID Code | QPlogPo/w | CID Code  | QPlogPo/w |
|--------------------|--------------|----------|-----------|-----------|-----------|
| <b>Bedaquiline</b> | <b>7.832</b> | 49767126 | 7.411     | 69305090  | 6.722     |
| 58853338           | 7.824        | 49767128 | 7.394     | 58853328  | 6.7       |
| 59805724           | 7.824        | 49767140 | 7.358     | 76961808  | 6.67      |
| 49767213           | 7.814        | 66647123 | 7.338     | 101857334 | 6.638     |
| 49767143           | 7.806        | 91248828 | 7.336     | 24990147  | 6.405     |
| 15979783           | 7.799        | 91536771 | 7.336     | 89390729  | 6.388     |
| 49767218           | 7.79         | 49767210 | 7.304     | 59229857  | 6.244     |
| 49767129           | 7.778        | 49767237 | 7.29      | 49767227  | 6.138     |
| 49767207           | 7.753        | 5746640  | 7.288     | 69665358  | 6.086     |
| 49767260           | 7.738        | 10325030 | 7.282     | 73950613  | 6.086     |
| 59805723           | 7.734        | 86579835 | 7.277     | 59239931  | 5.574     |
| 53392481           | 7.714        | 73950612 | 7.276     |           |           |
| 49767239           | 7.703        | 46849631 | 7.262     |           |           |
| 69647835           | 7.69         | 58857510 | 7.262     |           |           |
| 11421514           | 7.686        | 53392270 | 7.224     |           |           |
| 15947587           | 7.685        | 73357431 | 7.22      |           |           |
| 49767257           | 7.667        | 49767258 | 7.165     |           |           |
| 68276628           | 7.655        | 53392394 | 7.155     |           |           |
| 73950610           | 7.642        | 91290580 | 7.155     |           |           |
| 90998990           | 7.635        | 74223349 | 7.151     |           |           |
| 74223221           | 7.603        | 49767229 | 7.109     |           |           |
| 74223217           | 7.589        | 58857486 | 7.097     |           |           |
| 91380182           | 7.573        | 53392271 | 7.079     |           |           |
| 58581736           | 7.564        | 69665357 | 7.079     |           |           |
| 91798577           | 7.564        | 24990149 | 7.076     |           |           |
| 49767214           | 7.561        | 91278912 | 7.066     |           |           |
| 69331985           | 7.54         | 11713126 | 7.065     |           |           |
| 73950606           | 7.54         | 6319952  | 7.052     |           |           |
| 9958970            | 7.518        | 90770320 | 7.023     |           |           |
| 68452953           | 7.511        | 73950605 | 6.995     |           |           |
| 11226668           | 7.463        | 58857502 | 6.958     |           |           |
| 73950609           | 7.455        | 58857546 | 6.938     |           |           |
| 15947275           | 7.444        | 89880708 | 6.897     |           |           |
| 10414940           | 7.429        | 59229865 | 6.778     |           |           |
| 10030219           | 7.414        | 24990148 | 6.75      |           |           |

**Table S3.** Glide SP docking score of the Bedaquiline analogues against Mycobacterial ATP Synthase

| <b>CID Code</b>    | <b>Docking score</b> | <b>glide gscore</b> | <b>glide emodel</b> | <b>CID Code</b> | <b>Docking score</b> | <b>glide gscore</b> | <b>glide emodel</b> |
|--------------------|----------------------|---------------------|---------------------|-----------------|----------------------|---------------------|---------------------|
| 15947587           | -5.636               | -5.64               | -65.052             | 59239931        | -4.907               | -4.908              | -49.169             |
| 49767237           | -5.593               | -5.597              | -65.642             | 49767239        | -4.898               | -4.902              | -61.238             |
| 73950609           | -5.576               | -5.577              | -66.983             | 66647123        | -4.875               | -4.879              | -54.918             |
| 10030219           | -5.503               | -5.505              | -65.332             | 15979783        | -4.865               | -4.869              | -53.872             |
| 49767128           | -5.501               | -5.497              | -64.74              | 91290580        | -4.821               | -4.892              | -55.249             |
| 73950610           | -5.488               | -5.491              | -62.115             | 91380182        | -4.81                | -4.88               | -52.241             |
| 91248828           | -5.404               | -5.475              | -56.017             | 9958970         | -4.773               | -4.777              | -55.518             |
| 74223217           | -5.377               | -5.379              | -60.1               | 24990147        | -4.747               | -4.749              | -52.228             |
| 73950613           | -5.375               | -5.378              | -63.21              | 59805723        | -4.726               | -4.727              | -56.005             |
| <b>Bedaquiline</b> | -5.357               | -5.361              | -63.928             | 10325030        | -4.723               | -4.724              | -55.097             |
| 73950606           | -5.344               | -5.347              | -65.668             | 91278912        | -4.644               | -4.714              | -54.214             |
| 49767140           | -5.301               | -5.304              | -63.485             | 15947275        | -4.621               | -4.623              | -54.08              |
| 49767126           | -5.272               | -5.276              | -61.409             | 69665358        | -4.561               | -4.564              | -47.978             |
| 90998990           | -5.224               | -5.227              | -60.984             | 49767207        | -4.476               | -4.48               | -56.348             |
| 10414940           | -5.214               | -5.218              | -63.877             | 59229865        | -4.436               | -4.569              | -57.445             |
| 58857486           | -5.204               | -5.209              | -55.14              | 24990148        | -4.397               | -4.398              | -49.324             |
| 49767129           | -5.2                 | -5.203              | -64.922             | 59229857        | -4.38                | -4.413              | -46.815             |
| 11713126           | -5.138               | -5.142              | -62.543             | 11421514        | -4.377               | -5.191              | -56.632             |
| 6319952            | -5.138               | -5.142              | -62.543             | 89880708        | -4.33                | -4.337              | -44.732             |
| 90770320           | -5.135               | -5.206              | -57.48              | 58857510        | -4.31                | -4.315              | -51.429             |
| 91536771           | -5.132               | -5.132              | -61.194             | 68452953        | -4.221               | -4.292              | -49.051             |
| 49767227           | -5.093               | -5.093              | -61.213             | 24990149        | -4.219               | -4.22               | -49.231             |
| 49767210           | -5.087               | -5.09               | -57.844             | 73357431        | -4.17                | -4.173              | -44.482             |
| 69305090           | -5.086               | -5.089              | -61.39              | 76961808        | -4.115               | -4.116              | -48.384             |
| 69665357           | -5.081               | -5.152              | -59.595             | 49767260        | -3.992               | -4.21               | -40.054             |
| 73950612           | -5.081               | -5.152              | -59.595             | 74223349        | -3.925               | -3.928              | -39.04              |
| 101857334          | -5.062               | -5.063              | -59.856             | 49767213        | -3.876               | -3.878              | -47.481             |
| 5746640            | -5.044               | -5.047              | -59.185             | 69331985        | -3.816               | -4.005              | -48.174             |
| 89390729           | -5.025               | -5.026              | -63.838             | 68276628        | -3.76                | -4.354              | -52.562             |
| 58857546           | -5.011               | -5.015              | -55.461             | 11226668        | -3.598               | -4.412              | -53.809             |
| 49767214           | -4.983               | -4.987              | -50.162             | 49767229        | -3.566               | -3.575              | -43.709             |
| 71090872           | -4.973               | -4.996              | -56.8               | 58853328        | -3.537               | -4.351              | -52.734             |
| 49767143           | -4.946               | -4.95               | -57.318             | 46849631        | -3.402               | -3.402              | -41.672             |
| 73950605           | -4.938               | -4.941              | -55.944             | 53392270        | -3.402               | -3.402              | -41.672             |

**Table S3. Continue...**

| <b>CID Code</b> | <b>Docking score</b> | <b>glide gscore</b> | <b>glide emodel</b> | <b>CID Code</b> | <b>Docking score</b> | <b>glide gscore</b> | <b>glide emodel</b> |
|-----------------|----------------------|---------------------|---------------------|-----------------|----------------------|---------------------|---------------------|
| 58581736        | -4.919               | -4.923              | -54.303             | 53392271        | -3.337               | -3.337              | -42.181             |
| 91798577        | -4.919               | -4.923              | -54.303             | 69647835        | -3.305               | -3.305              | -44.163             |
| 58857502        | -4.907               | -4.911              | -52.033             | 49767258        | -3.178               | -3.66               | -48.61              |
| 53392394        | -3.044               | -3.044              | -36.848             | 49767257        | -2.527               | -2.873              | -36.925             |
| 49767218        | -3.038               | -3.047              | -37.774             | 86579835        | -2.115               | -3.281              | -38.886             |
| 53392481        | -2.7                 | -2.7                | -36.321             | 74223221        | -1.155               | -2.622              | -37.703             |



**Table S4.** Glide SP docking score of the diastereomers of virtually screened hit against *Mycobacterial* ATP Synthase

| Compound Code       | Diastereomers                                                                       | Docking score | Glide gscore | Glide emodel |
|---------------------|-------------------------------------------------------------------------------------|---------------|--------------|--------------|
| <b>CID 15947587</b> | 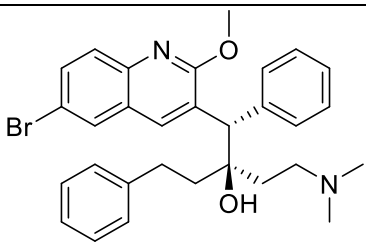   | -5.636        | -5.64        | -65.052      |
|                     |    | -5.185        | -5.186       | -55.839      |
| <b>CID 49767237</b> |   | -5.593        | -5.597       | -65.642      |
|                     |  | -5.058        | -5.062       | -55.212      |
|                     |  | -4.937        | -4.941       | -61.051      |

Table S4. Continue...

| Compound Code | Diastereomers                                                                       | Docking score | Glide gscore | Glide emodel |
|---------------|-------------------------------------------------------------------------------------|---------------|--------------|--------------|
| CID 73950609  | 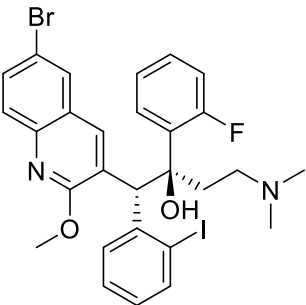   | -5.576        | -5.577       | -66.983      |
|               |    | -5.249        | -5.253       | -51.287      |
|               |   | -5.100        | -5.104       | -63.541      |
| CID 10030219  |  | -5.503        | -5.497       | -64.74       |
|               |  | -4.408        | -4.412       | -49.904      |

Table S4. *Continue...*

| Compound Code                                          | Diastereomers                                                                       | Docking score | Glide gscore | Glide emodel |
|--------------------------------------------------------|-------------------------------------------------------------------------------------|---------------|--------------|--------------|
| <p style="text-align: center;"><b>CID 49767128</b></p> | 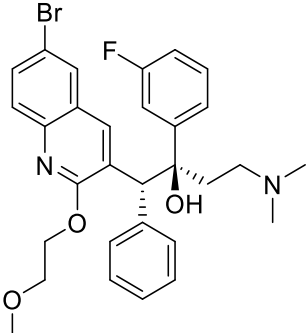   | -5.501        | -5.505       | -65.332      |
|                                                        |    | -4.300        | -4.304       | -49.091      |
| <p style="text-align: center;"><b>CID 73950610</b></p> |   | -5.488        | -5.491       | -62.115      |
|                                                        |  | -5.470        | -5.474       | -62.991      |

Table S4. Continue...

| Compound Code | Diastereomers                                                                       | Docking score | Glide gscore | Glide emodel |
|---------------|-------------------------------------------------------------------------------------|---------------|--------------|--------------|
| CID 91248828  | 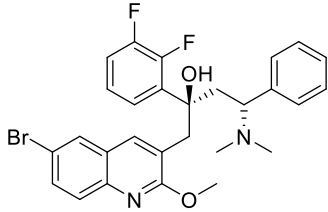   | -5.404        | -5.475       | -56.017      |
|               |    | -4.143        | -4.213       | -48.371      |
|               |    | -3.373        | -3.443       | -39.758      |
| CID 74223217  |   | -5.377        | -5.379       | -60.10       |
|               |  | -3.949        | -3.950       | -42.269      |
|               |  | -3.897        | -3.899       | -43.375      |

**Table S4.** *Continue...*

| Compound Code                                          | Diastereomers                                                                      | Docking score | Glide gscore | Glide emodel |
|--------------------------------------------------------|------------------------------------------------------------------------------------|---------------|--------------|--------------|
| <p style="text-align: center;"><b>CID 73950613</b></p> | 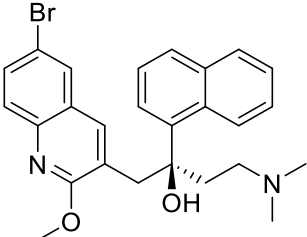  | -5.375        | -5.378       | -63.21       |
|                                                        |   | -4.561        | -4.564       | -47.978      |
| <p style="text-align: center;"><b>Bedaquiline</b></p>  |  | -5.357        | -5.361       | -63.928      |

# Novelty of Compounds

Among the 9 virtually screened hits CID 73950609, CID 73950610 and CID 91248828 were novel for the anti-mycobacterial activity

### 1. Preparation of quinoline derivatives as antitubercular agents

By Deng, Jie; Lei, Huangshu; Wang, Weibo; Liu, Caiping; Ye, Wenrun; Xu, Liyan; Zhou, Changbing; Zhang, Guoyao; Zou, Yanye; He, Zhiqin

From [PCT Int. Appl. \(2015\), WO 2015096611 A1 20150702](#), Language: Chinese, Database: CAPLUS

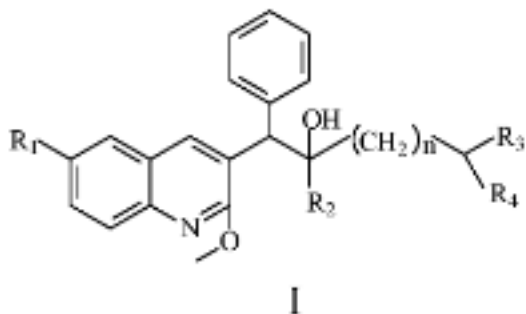

The invention relates to quinoline derivs. of formula I, method for their prepn. and their use in the treatment of tubercule bacillus infection. Compds. of formula I, wherein R<sup>1</sup> is H, halo, OH, alkyl, etc.; R<sup>2</sup> is (un)substituted Ph, naphthyl, heterocycle, etc.; R<sup>3</sup> and R<sup>4</sup> together form satd. or unsatd. heterocycle; and Z is (CH<sub>2</sub>)<sub>0-4</sub>; and their optical isomers, racemates, diastereomers, pharmaceutically acceptable salts or solvates, are claimed. Example compd. II was prepd. by addn. reaction of 3-benzyl-6-bromo-2-methoxyquinoline with [1-(diphenylmethyl)-3-azetidiny]phenylmethanone. All the invention compds. were evaluated for their antitubercular activity. From the assay, it was detd. that example compd. II exhibited MIC value of ≥ 8 μg / mL.

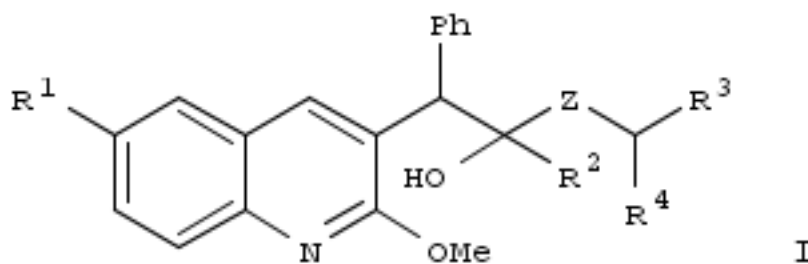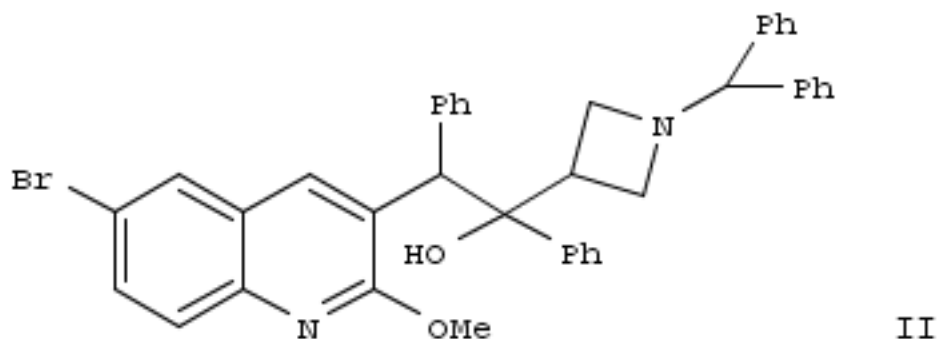

#### ~0 Citings

Copyright © 2021 American Chemical Society (ACS). All Rights Reserved.

### 2. Preparation of quinoline derivatives as antitubercular agents

By Deng, Jie; Lei, Huangshu; Wang, Weibo; Liu, Caiping; Ye, Wenrun; Xu, Liyan; Zhou, Changbing; Zhang, Guoyao; Zou, Yanye; He, Zhiqin

From [Faming Zhuanli Shenqing \(2014\), CN 103664877 A 20140326](#), Language: Chinese, Database: CAPLUS

The invention relates to quinoline derivs. of formula I, method for their prepn. and their use in the treatment of tubercule bacillus infection. Compds. of formula I, wherein R<sup>1</sup> is H, halo, OH, alkyl, etc.; R<sup>2</sup> is (un)substituted Ph, naphthyl, heterocycle, etc.; R<sup>3</sup> and R<sup>4</sup> together form satd. or unsatd. heterocycle; and Z is (CH<sub>2</sub>)<sub>0-4</sub>; and their optical isomers, racemates, diastereomers, pharmaceutically acceptable salts or solvates, are claimed. Example compd. II was prepd. by addn. reaction of 3-benzyl-6-bromo-2-methoxyquinoline with [1-(diphenylmethyl)-3-azetidiny]phenylmethanone. All the invention compds. were evaluated for their antitubercular activity. From the assay, it was detd. that example compd. II exhibited MIC value of ≥ 8 μg / mL.

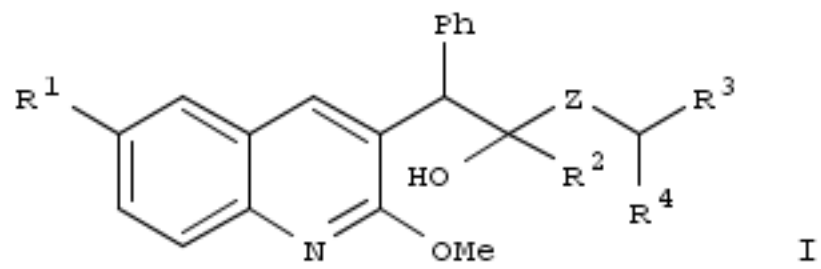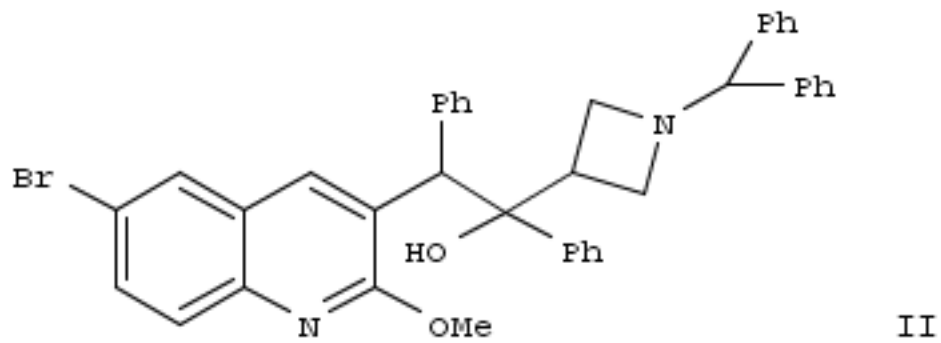

~1 Citing



## 1. Diarylquinolines, synthesis pathways and quantitative structure-activity relationship studies leading to the discovery of TMC207

By Guillemont, Jerome; Meyer, Christophe; Poncelet, Alain; Bourdrez, Xavier; Andries, Koen  
From *Future Medicinal Chemistry* (2011), 3(11), 1345-1360. Language: English, Database: CAPLUS,  
DOI:10.4155/fmc.11.79

The emergence of multidrug-resistant strains of *Mycobacterium tuberculosis* and resistance to current anti-TB drugs call for the discovery and development of new effective anti-TB drugs. TMC207 is the lead candidate of a novel class of antimycobacterial agents, the diarylquinolines, which specifically inhibit mycobacterial ATP synthase and displays high activity against both drug-susceptible and multidrug-resistant strains of *Mycobacterium tuberculosis*. This article covers both synthesis pathways as well as qual. and quant. analyses of the structure-activity relationships of the diarylquinoline series on *Mycobacterium smegmatis* activity.

### ~43 Citings

Copyright © 2021 American Chemical Society (ACS). All Rights Reserved.

## 2. Preparation of aminohydroxyphenylbutylquinolines as antibacterials.

By Andries, Koenraad Jozef Lodewijk Marcel; Koul, Anil; Guillemont, Jerome Emile Georges; Pasquier, Elisabeth Therese Jeanne; Lancois, David Francis Alain  
From *PCT Int. Appl.* (2006), WO 2006131519 A1 20061214, Language: English, Database: CAPLUS

Use of title compds. [I; R<sup>1</sup> = H, halo, polyhaloalkyl, alkyl, hydroxyalkyl, alkoxy, Ar, Het; p, q = 1, 2; R<sup>2</sup> = alkoxy, alkoxyalkoxy, alkylthio; R<sup>3</sup> = alkyl, Ar, Het, Het1; R<sup>4</sup>, R<sup>5</sup> = H, alkyl, benzyl; R<sup>4</sup>R<sup>5</sup>N = (substituted) pyrrolidinyl, pyrrolinyl, pyrrolyl, imidazolidinyl, pyrazolidinyl, imidazolyl, pyrazolyl, triazolyl, piperidinyl, pyridinyl, piperazinyl, pyridazinyl, pyrimidinyl, pyrazinyl, triazinyl, morpholinyl, thiomorpholinyl; R<sup>6</sup> = H, halo, polyhaloalkyl, alkyl, alkoxy, alkylthio; 2 vicinal R<sup>6</sup> may = CH:CHCH:CH; R<sup>7</sup> = H, alkyl, Ar, Het, Het1; Ar = (substituted) Ph, naphthyl, acenaphthyl, 1,2-dihydroacenaphthyl, tetrahydronaphthyl; Het = (substituted) piperidyl, pyrrolyl, N-phenoxy piperidyl, pyrazolyl, triazolyl, imidazolyl, furyl, pyridyl, pyrimidyl, pyrazinyl, etc.; Het1 = (substituted) quinolyl, quinoxalyl, indolyl, benzimidazolyl, benzofuryl, benzothienyl, 2,3-dihydrobenzodioxinyl, etc.; with provisos], for manuf. of a medicament for treatment of bacterial infection is claimed. Thus, a diastereomer of title compd. (II) (prepn. outlined) showed an IC<sub>90</sub> = 10.8 µg/mL against *Streptococcus mutans* ATCC33402.

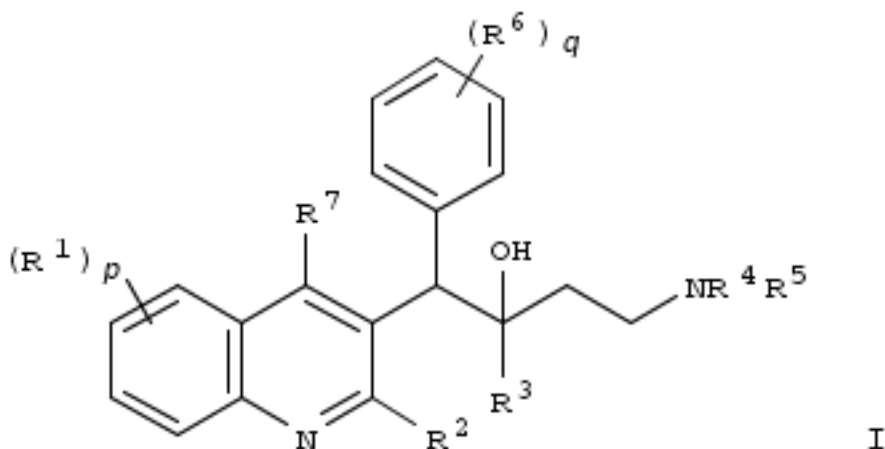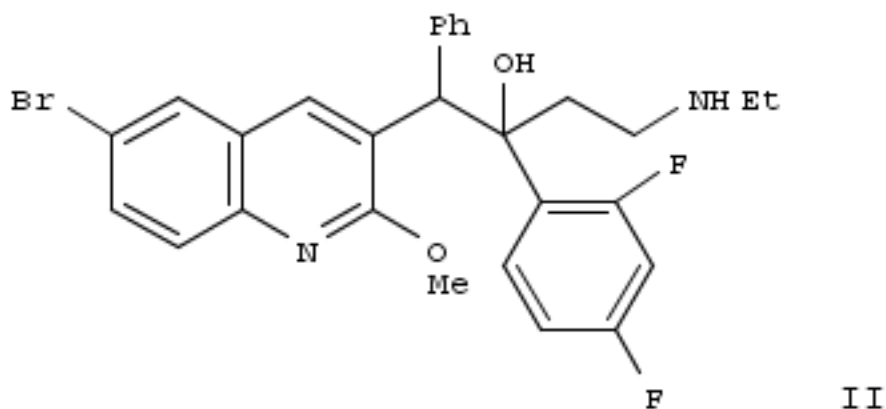

~10 Citings

Copyright © 2021 American Chemical Society (ACS). All Rights Reserved.

### 3. Preparation of quinoline derivatives and their use as mycobacterial inhibitors

By Koul, Anil; Andries, Koenraad Jozef Lodewijk Marcel

From [Can. Pat. Appl. \(2006\), CA 2529265 A1 20060624](#), Language: English, Database: CAPLUS

The title compds. [I or II; R<sup>1</sup> = H, halo, haloalkyl, CN, etc.; p = 0-4; R<sup>2</sup> = H, OH, thio, alkoxy, etc.; R<sup>3</sup> = alkyl, aryl, aralkyl, heteroaryl, heteroarylalkyl; q = 0-4; R<sup>4</sup>, R<sup>5</sup> = H, alkyl, CH<sub>2</sub>Ph; or NR<sup>4</sup>R<sup>5</sup> = pyrrolidinyl, imidazolyl, triazolyl, etc.; R<sup>6</sup> = H, halo, haloalkyl, etc.; or two vicinal R<sup>6</sup> may be taken together to form CH:CHCH:CH; r = 0-5; R<sup>7</sup> = H, alkyl, aryl, heteroaryl; R<sup>8</sup> = H, alkyl; R<sup>9</sup> = oxo; or R<sup>8</sup> and R<sup>9</sup> together form NCH:CH] which are useful for the treatment of mycobacterial diseases, particularly those diseases caused by pathogenic mycobacteria such as *Mycobacterium tuberculosis*, *M. bovis*, *M. avium* and *M. marinum*, were prepd. In particular, compds. are claimed in which, independently from each other, R<sup>1</sup> = Br, p = 1, R<sup>2</sup> = alkyloxy, R<sup>3</sup> = (un)substituted naphthyl or Ph, q = 1, R<sup>4</sup> and R<sup>5</sup> each independently = H, Me or Et, R<sup>6</sup> = H, r = 0-1 and R<sup>7</sup> = H. E.g., a multi-step synthesis of III which showed MIC of 0.34 µg/mL and pIC<sub>50</sub> of 8.5 against *M. tuberculosis* and *M. smegmatis*, resp., was given. Also claimed is a compn. comprising a pharmaceutically acceptable carrier and, as active ingredient, a therapeutically effective amt. of the claimed compds. I, the use of the claimed compds. or compns. for the manuf. of a medicament for the treatment of mycobacterial diseases and a process for prepg. the claimed compds.

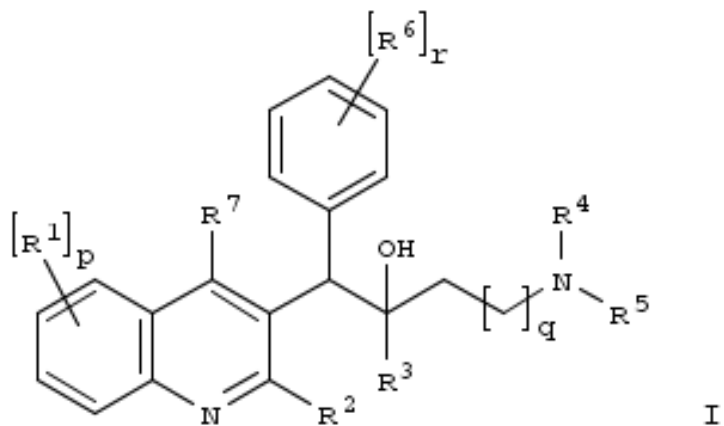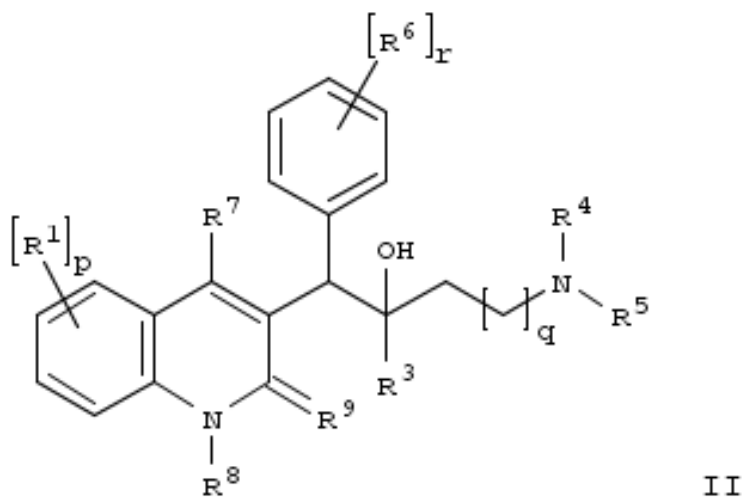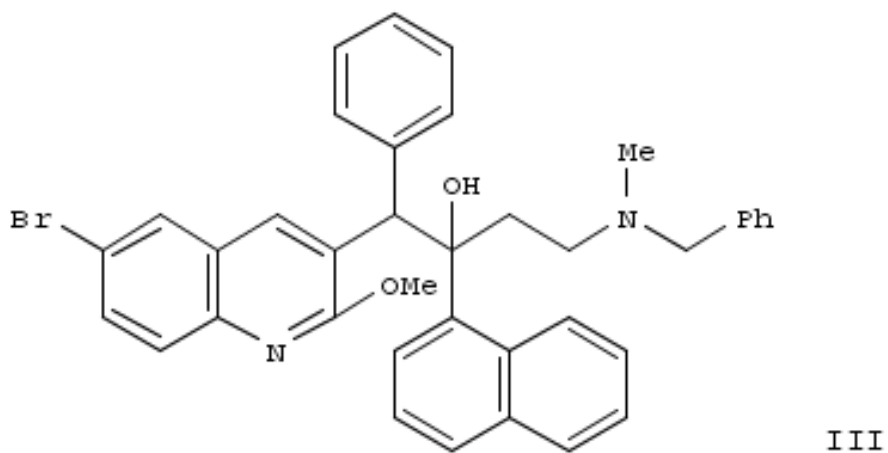

~12 Citings

Copyright © 2021 American Chemical Society (ACS). All Rights Reserved.

#### 4. Preparation of aminohydroxyaralkylquinolines for the treatment of drug resistant mycobacterial diseases

By Andries, Koenraad Jozef Lodewijk Marcel; Van Gestel, Jozef Frans Elisabetha  
 From [PCT Int. Appl. \(2005\), WO 2005117875 A1 20051215](#), Language: English, Database: CAPLUS

Use of title compds. [I, II; R<sup>1</sup> = H, halo, haloalkyl, cyano, OH, aryl, heterocyclyl, alkyl, alkoxy, alkylthio, alkoxyalkyl, etc.; p = 1-4; R<sup>2</sup> = H, OH, SH, alkoxy, alkylthio, alkylamino, etc.; R<sup>3</sup> = alkyl, aryl, heterocyclyl, aralkyl, heterocyclylalkyl; q = 0-4; R<sup>4</sup>, R<sup>5</sup> = H, alkyl, PhCH<sub>2</sub>; R<sup>4</sup>R<sup>5</sup>N = (substituted) pyrrolidinyl, imidazolyl, morpholinyl, thiomorpholinyl, pyrazinyl, etc.; R<sup>6</sup> = H, halo, haloalkyl, OH, aryl, alkyl, alkoxy, alkylthio, aralkyl, etc.; 2 vicinal R<sup>6</sup> = CH:CHCH:CH; m = 1-5; R<sup>7</sup> = H, alkyl, aryl, heterocyclyl; R<sup>8</sup> = H, alkyl; R<sup>9</sup> = O; R<sup>8</sup>R<sup>9</sup> = NCH:CH] for prepn. of a medicament for treatment of an infection with a drug resistant Mycobacterium strain is claimed. Title compds. showed min. inhibitory concns. of 0.06-0.12 mg/L against isoniazid-resistant M. tuberculosis.

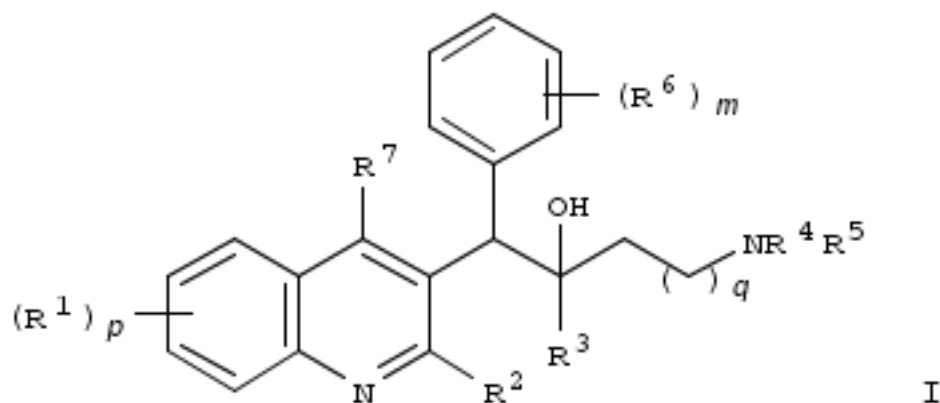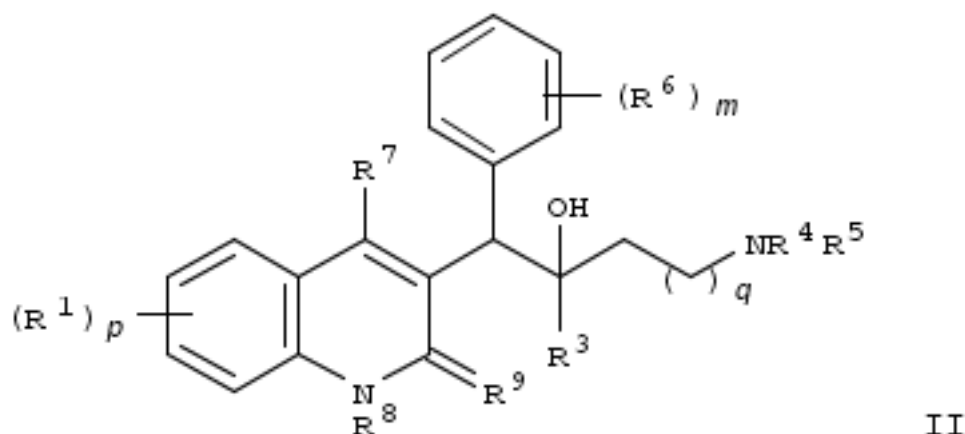

~25 Citings

Copyright © 2021 American Chemical Society (ACS). All Rights Reserved.

## 5. Preparation of quinoline derivatives and their use as mycobacterial inhibitors

By Van Gestel, Jozef Frans Elisabetha; Guillemont, Jerome Emile Georges; Venet, Marc Gaston; Poignet, Herve Jean Joseph; Decrane, Laurence Francoise Bernadette; Vernier, Daniel F. J.; Odds, Frank Christopher  
From [U.S. Pat. Appl. Publ. \(2005\), US 20050148581 A1 20050707](#), Language: English, Database: CAPLUS

The title compds. [I or II; R<sup>1</sup> = H, halo, haloalkyl, CN, etc.; p = 0-4; R<sup>2</sup> = H, OH, thio, alkoxy, etc.; R<sup>3</sup> = alkyl, aryl, aralkyl, heteroaryl, heteroarylalkyl; q = 0-4; R<sup>4</sup>, R<sup>5</sup> = H, alkyl, CH<sub>2</sub>Ph; or NR<sup>4</sup>R<sup>5</sup> = pyrrolidinyl, imidazolyl, triazolyl, etc.; R<sup>6</sup> = H, halo, haloalkyl, etc.; or two vicinal R<sup>6</sup> may be taken together to form CH:CHCH:CH; r = 0-5; R<sup>7</sup> = H, alkyl, aryl, heteroaryl; R<sup>8</sup> = H, alkyl; R<sup>9</sup> = oxo; or R<sup>8</sup> and R<sup>9</sup> together form NCH:CH] which are useful for the treatment of mycobacterial diseases, particularly those diseases caused by pathogenic mycobacteria such as Mycobacterium tuberculosis, M. bovis, M. avium and M. marinum, were prepd. In particular, compds. are claimed in which, independently from each other, R<sup>1</sup> = Br, p = 1, R<sup>2</sup> = alkyloxy, R<sup>3</sup> = (un)substituted naphthyl or Ph, q = 1, R<sup>4</sup> and R<sup>5</sup> each independently = H, Me or Et, R<sup>6</sup> = H, r = 0-1 and R<sup>7</sup> = H. E.g., a multi-step synthesis of III which showed MIC of 0.34 µg/mL and pIC<sub>50</sub> of 8.5 against M. tuberculosis and M. smegmatis, resp., was given. Also claimed is a compn. comprising a pharmaceutically acceptable carrier and, as active ingredient, a therapeutically effective amt. of the claimed compds. I, the use of the claimed compds. or compns. for the manuf. of a medicament for the treatment of mycobacterial diseases and a process for prepg. the claimed compds.

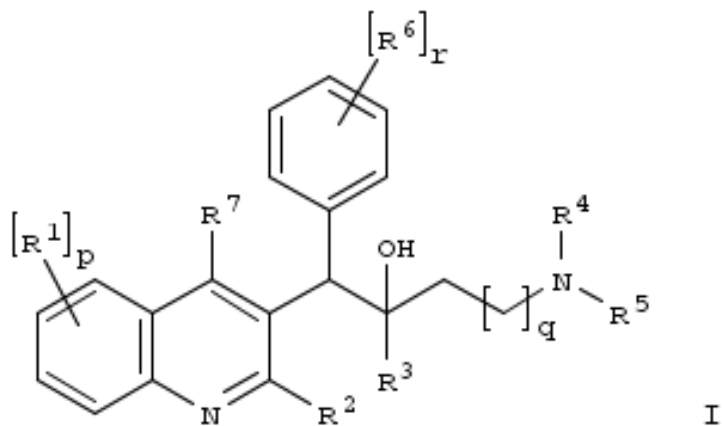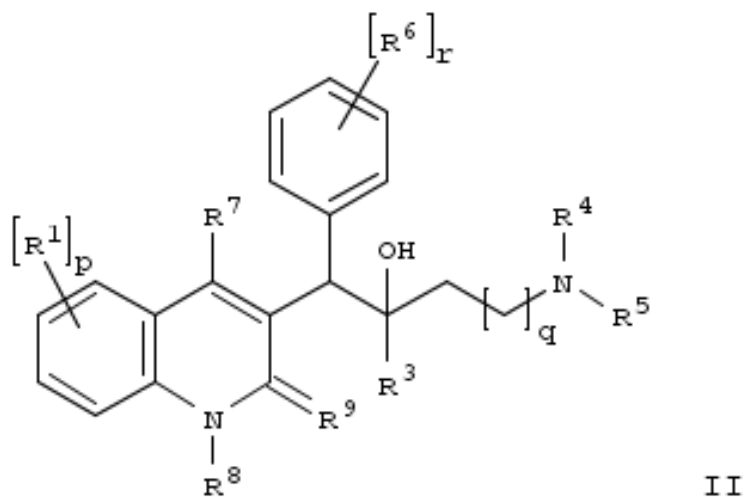

~12 Citings

Copyright © 2021 American Chemical Society (ACS). All Rights Reserved.

## 6. Preparation of quinoline derivatives and their use as mycobacterial inhibitors

By Guillemont, Jerome Emile Georges; Van Gestel, Jozef Frans Elisabetha; Venet, Marc Gaston; Poignet, Herve Jean Joseph; Decrane, Laurence Francoise Bernadette; Vernier, Daniel F. J.  
 From [PCT Int. Appl. \(2004\), WO 2004011436 A1 20040205](#), Language: English, Database: CAPLUS

The title compds. [I or II; R<sup>1</sup> = H, halo, haloalkyl, CN, etc.; p = 0-4; R<sup>2</sup> = H, OH, thio, alkoxy, etc.; R<sup>3</sup> = alkyl, aryl, aralkyl, heteroaryl, heteroarylalkyl; q = 0-4; R<sup>4</sup>, R<sup>5</sup> = H, alkyl, CH<sub>2</sub>Ph; or NR<sup>4</sup>R<sup>5</sup> = pyrrolidinyl, imidazolyl, triazolyl, etc.; R<sup>6</sup> = H, halo, haloalkyl, etc.; or two vicinal R<sup>6</sup> may be taken together to form C:CC:C; r = 0-5; R<sup>7</sup> = H, alkyl, aryl, heteroaryl; R<sup>8</sup> = H, alkyl; R<sup>9</sup> = oxo; or R<sup>8</sup> and R<sup>9</sup> together form NCH:CH] which are useful for the treatment of mycobacterial diseases, particularly those diseases caused by pathogenic mycobacteria such as Mycobacterium tuberculosis, M. bovis, M. avium and M. marinum, were prepd. In particular, compds. are claimed in which, independently from each other, R<sup>1</sup> = Br, p = 1, R<sup>2</sup> = alkyloxy, R<sup>3</sup> = (un)substituted naphthyl or Ph, q = 1, R<sup>4</sup> and R<sup>5</sup> each independently = H, Me or Et, R<sup>6</sup> = H, r = 0-1 and R<sup>7</sup> = H. E.g., a multi-step synthesis of III which showed MIC of 0.34 µg/mL and pIC<sub>50</sub> of 8.5 against M. tuberculosis and M. smegmatis, resp., was given. Also claimed is a compn. comprising a pharmaceutically acceptable carrier and, as active ingredient, a therapeutically effective amt. of the claimed compds. I, the use of the claimed compds. or compns. for the manuf. of a medicament for the treatment of mycobacterial diseases and a process for prep. the claimed compds.

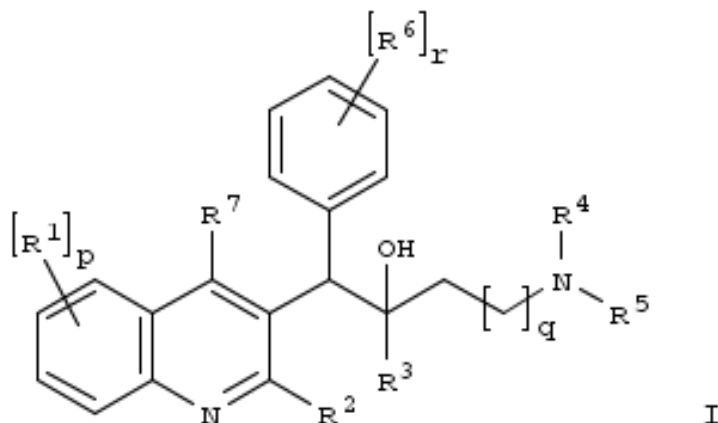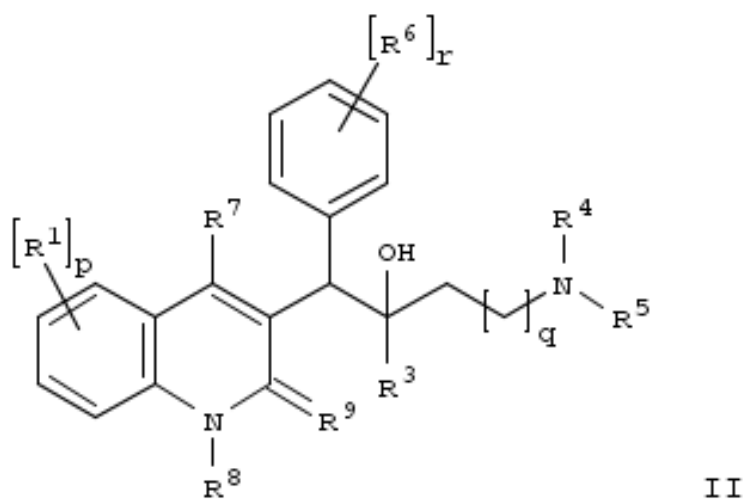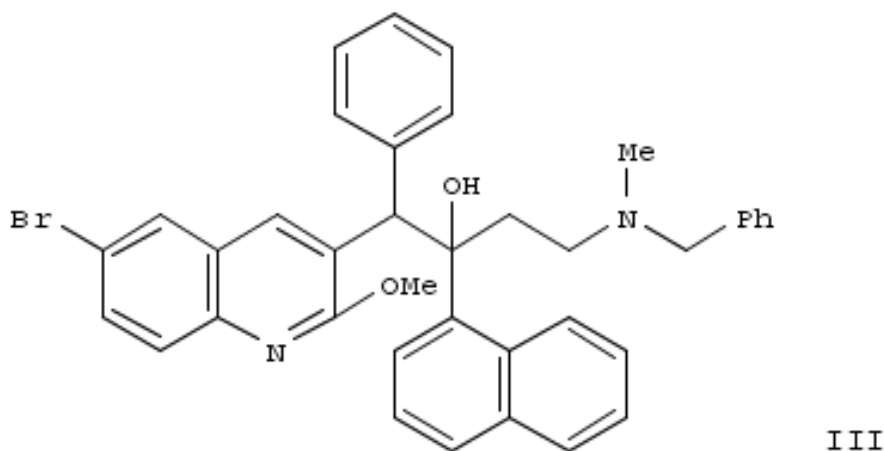

**~58 Citings**

Copyright © 2021 American Chemical Society (ACS). All Rights Reserved.

## 1. Antibacterial quinoline derivatives and their preparation and use in the treatment of bacterial infection

By Guillemont, Jerome Emile Georges; Dorange, Ismet; Andries, Koenraad Jozef Lodewijk Marcel; Koul, Anil  
From *PCT Int. Appl.* (2008), [WO 2008068266 A1 20080612](#), Language: English, Database: CAPLUS

The invention relates to substituted quinoline derivs. according to the general formula I and II: including any stereochem. isomeric form thereof, N-oxide thereof, a pharmaceutically acceptable salt thereof or a solvate thereof. The claimed compds. are useful for the treatment of a bacterial infection. Also claimed is a compn. comprising a pharmaceutically acceptable carrier and, as active ingredient, a therapeutically effective amt. of the claimed compds., the use of the claimed compds. or compns. for the manuf. of a medicament for the treatment of a bacterial infection and a process for prepg. the claimed compds. Compds. of formula I and II wherein Q is substituted aminoalk-1-enyl, substituted aminoalk-2-enyl, substituted 2-(aminoalkyl)alk-2-enyl; n is 1, 2, 3 and 4; R<sup>1</sup> is H, CN, CHO, CO, halo, (halo)alkyl, C<sub>2-6</sub> alkenyl, C<sub>2-6</sub> alkynyl, OH, alkoxy, etc.; R<sup>2</sup> is H, alkoxy, aryl, aryloxy, OH, mercapto, , etc.; R<sup>7</sup> is H, halo, alkyl, aryl, and monocyclic heterocycle; R<sup>8</sup> is H and alkyl; R<sup>9</sup> is oxo; R<sup>8</sup>R<sup>9</sup> taken together to form CH=CH-N=; and their stereochem. isomeric forms, N-oxides, pharmaceutically acceptable salts, and solvates thereof, are claimed. Example compd. III was prepd. by a general procedure (procedure given). All the invention compds. were evaluated for their antibacterial activity. From the assay, it was detd. that compd. III exhibited IC<sub>90</sub> value of 1.65 µG/mL.

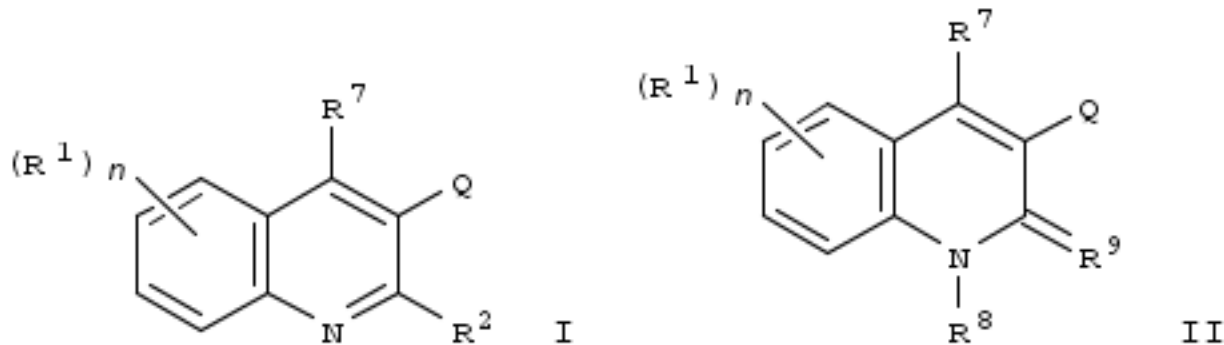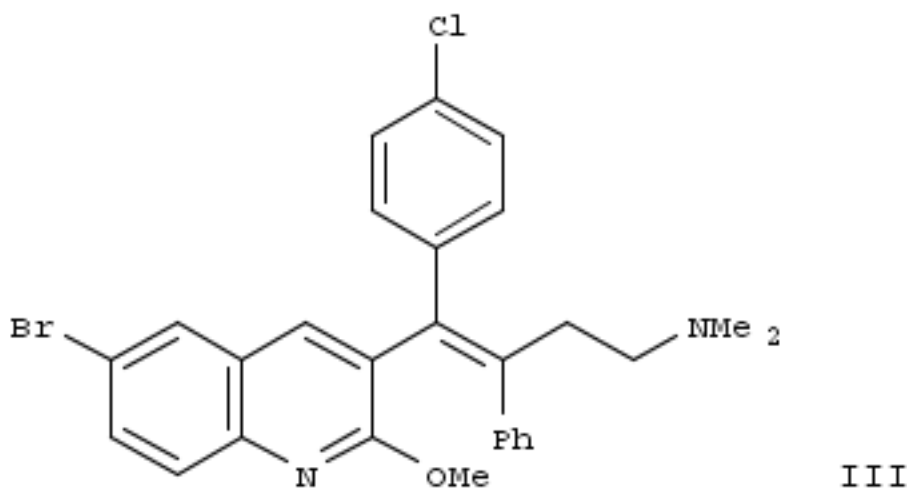

### ~1 Citing

Copyright © 2021 American Chemical Society (ACS). All Rights Reserved.

## 2. Quinoline derivatives as antibacterial agents and their preparation, pharmaceutical compositions and use in the treatment of bacterial infections

By Andries, Koenraad Jozef Lodewijk Marcel; Koul, Anil; Guillemont, Jerome Emile Georges; Motte, Magali Madeleine Simone

From *PCT Int. Appl.* (2007), [WO 2007000436 A1 20070104](#), Language: English, Database: CAPLUS



Use of a compd. for the manuf. of a medicament for the treatment of a bacterial infection provided that the bacterial infection is other than a Mycobacterial infection, said compd. being a compd. of formula I or II a pharmaceutically acceptable acid or base addn. salt thereof, a stereochem. isomeric form thereof, a tautomeric form thereof or a N-oxide form thereof. Compds. of formula I and II wherein R<sup>1</sup> is H, halo, haloalkyl, CN, OH, (un)substituted aryl, (un)substituted heterocyclyl, (un)substituted alkyl, etc.; p is 1, 2, 3, and 4; R<sup>2</sup> is H, OH, mercapto, alkyloxy(alkyloxy), alkylthio, etc.; R<sup>3</sup> is (un)substituted aryl and (un)substituted heterocyclyl; R<sup>4</sup> and R<sup>5</sup> are independently H, (un)substituted alkyl, benzyl; R<sup>4</sup>R<sup>5</sup> together with N may form a heterocycle; R<sup>6</sup> is H, halo, haloalkyl, alkoxy, (un)substituted aryl, (un)substituted alkyl, etc.; r is 1, 2, 3, 4, and 5; R<sup>7</sup> is H, (un)substituted alkyl, (un)substituted aryl and (un)substituted heterocyclyl; R<sup>8</sup> is H, and (un)substituted alkyl, R<sup>9</sup> is oxo; R<sup>8</sup>R<sup>9</sup> together may form the radical CH=CH-N=; A is (un)branched C<sub>1-6</sub> alkyl; and their pharmaceutically acceptable acid and base salts, stereochem. isomeric forms, tautomeric forms, and N-oxides thereof, are claimed. Several of these compds. are also claimed as such. Further the combination of the above compds. with other antibacterial agents is described. Example compd. III was prepd. by addn. of 3-benzyl-2-methoxy-6-methylquinoline to 1-(dimethylamino)-5-phenyl-3-pentanone. All the invention compds. were evaluated for their antibacterial activity. From the assay, it was detd. that compd. III exhibited IC<sub>90</sub> values in the range of 1.9 - 37.2 µg/mL against various bacteria.

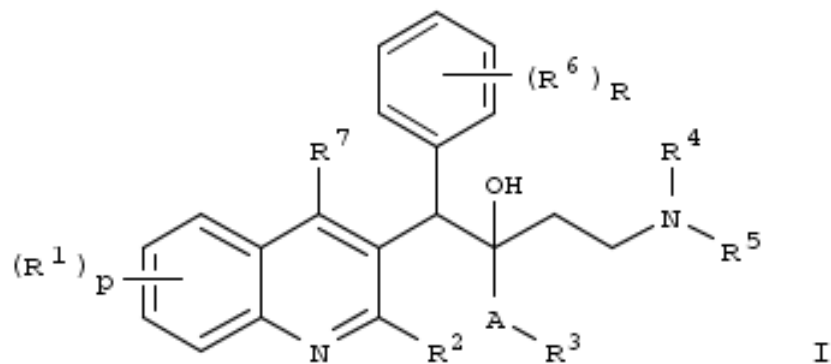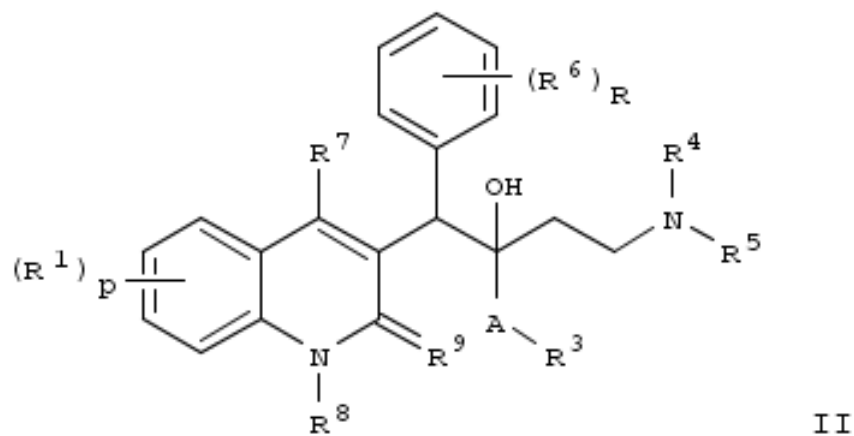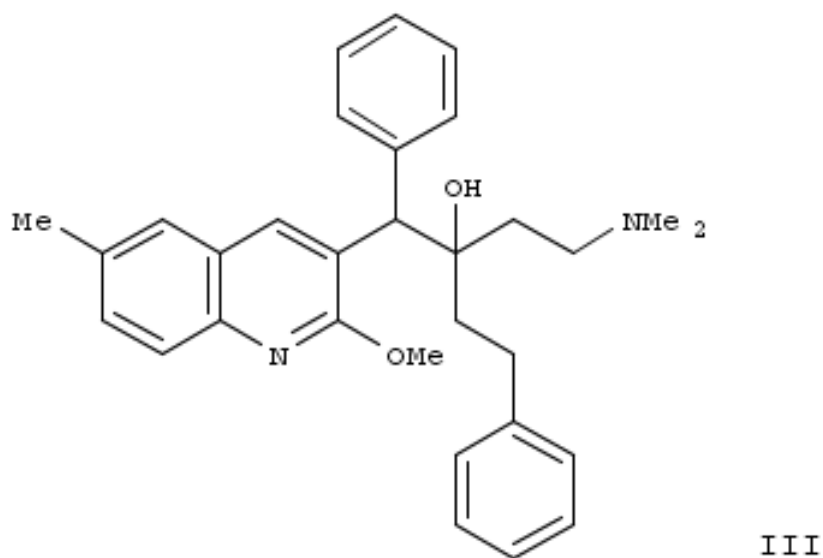

~1 Citing

Copyright © 2021 American Chemical Society (ACS). All Rights Reserved.

### 3. Preparation of quinoline derivatives and their use as mycobacterial inhibitors

By Koul, Anil; Andries, Koenraad Jozef Lodewijk Marcel  
 From [Can. Pat. Appl. \(2006\), CA 2529265 A1 20060624](#), Language: English, Database: CAPLUS

The title compds. [I or II; R<sup>1</sup> = H, halo, haloalkyl, CN, etc.; p = 0-4; R<sup>2</sup> = H, OH, thio, alkoxy, etc.; R<sup>3</sup> = alkyl, aryl, aralkyl, heteroaryl, heteroarylalkyl; q = 0-4; R<sup>4</sup>, R<sup>5</sup> = H, alkyl, CH<sub>2</sub>Ph; or NR<sup>4</sup>R<sup>5</sup> = pyrrolidinyl, imidazolyl, triazolyl, etc.; R<sup>6</sup> = H, halo, haloalkyl, etc.; or two vicinal R<sup>6</sup> may be taken together to form CH:CHCH:CH; r = 0-5; R<sup>7</sup> = H, alkyl, aryl, heteroaryl; R<sup>8</sup> = H, alkyl; R<sup>9</sup> = oxo; or R<sup>8</sup> and R<sup>9</sup> together form NCH:CH] which are useful for the treatment of mycobacterial diseases, particularly those diseases caused by pathogenic mycobacteria such as Mycobacterium tuberculosis, M. bovis, M. avium and M. marinum, were prepd. In particular, compds. are claimed in which, independently from each other, R<sup>1</sup> = Br, p = 1, R<sup>2</sup> = alkyloxy, R<sup>3</sup> = (un)substituted naphthyl or Ph, q = 1, R<sup>4</sup> and R<sup>5</sup> each independently = H, Me or Et, R<sup>6</sup> = H, r = 0-1 and R<sup>7</sup> = H. E.g., a multi-step synthesis of III which showed MIC of 0.34 µg/mL and pIC<sub>50</sub> of 8.5 against M. tuberculosis and M. smegmatis, resp., was given. Also claimed is a compn. comprising a pharmaceutically acceptable carrier and, as active ingredient, a therapeutically effective amt. of the claimed compds. I, the use of the claimed compds. or compns. for the manuf. of a medicament for the treatment of mycobacterial diseases and a process for prepg. the claimed compds.

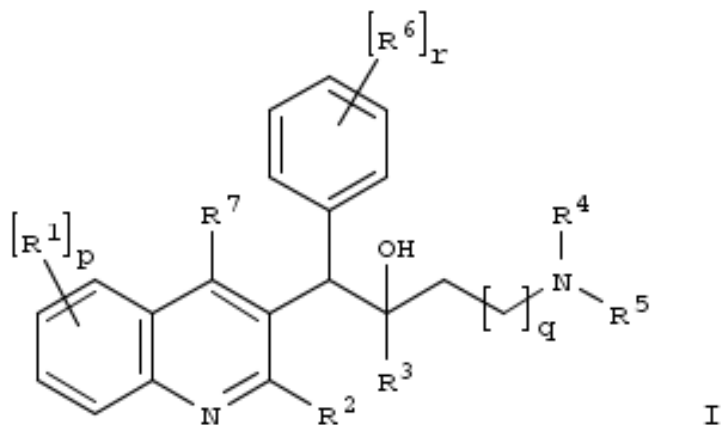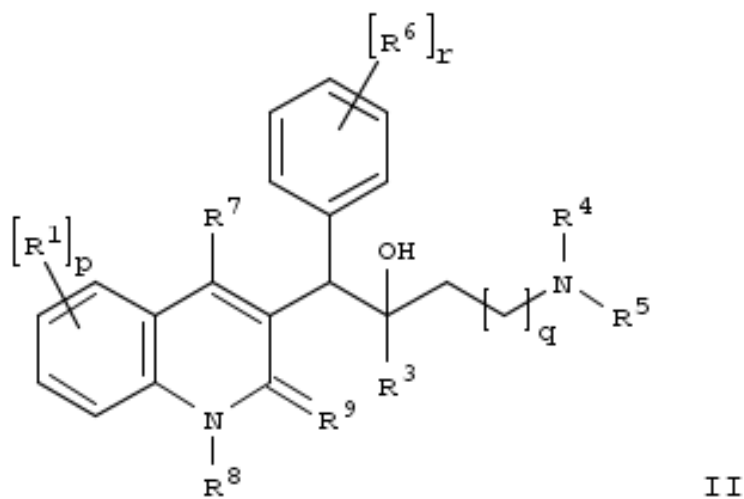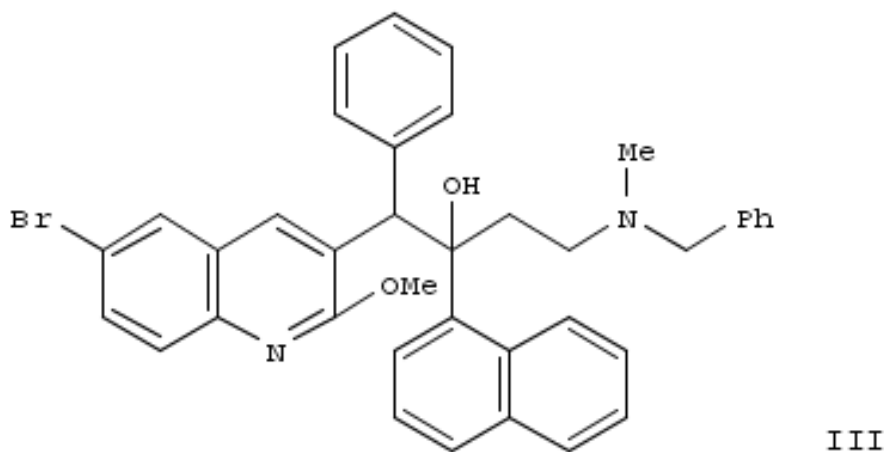

~12 Citings

Copyright © 2021 American Chemical Society (ACS). All Rights Reserved.

**4. Preparation of aminohydroxyaralkylquinolines for the treatment of drug resistant mycobacterial diseases**By Andries, Koenraad Jozef Lodewijk Marcel; Van Gestel, Jozef Frans Elisabetha  
From *PCT Int. Appl. (2005)*, [WO 2005117875 A1 20051215](#), Language: English, Database: CAPLUS

Use of title compds. [I, II; R<sup>1</sup> = H, halo, haloalkyl, cyano, OH, aryl, heterocyclyl, alkyl, alkoxy, alkylthio, alkoxyalkyl, etc.; p = 1-4; R<sup>2</sup> = H, OH, SH, alkoxy, alkylthio, alkylamino, etc.; R<sup>3</sup> = alkyl, aryl, heterocyclyl, aralkyl, heterocyclylalkyl; q = 0-4; R<sup>4</sup>, R<sup>5</sup> = H, alkyl, PhCH<sub>2</sub>; R<sup>4</sup>R<sup>5</sup>N = (substituted) pyrrolidinyl, imidazolyl, morpholinyl, thiomorpholinyl, pyrazinyl, etc.; R<sup>6</sup> = H, halo, haloalkyl, OH, aryl, alkyl, alkoxy, alkylthio, aralkyl, etc.; 2 vicinal R<sup>6</sup> = CH:CHCH:CH; m = 1-5; R<sup>7</sup> = H, alkyl, aryl, heterocyclyl; R<sup>8</sup> = H, alkyl; R<sup>9</sup> = O; R<sup>8</sup>R<sup>9</sup> = NCH:CH] for prepn. of a medicament for treatment of an infection with a drug resistant Mycobacterium strain is claimed. Title compds. showed min. inhibitory concns. of 0.06-0.12 mg/L against isoniazid-resistant M. tuberculosis.

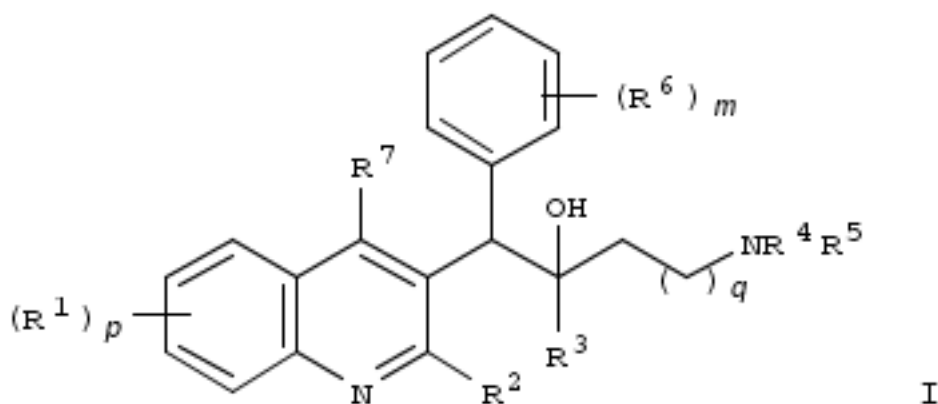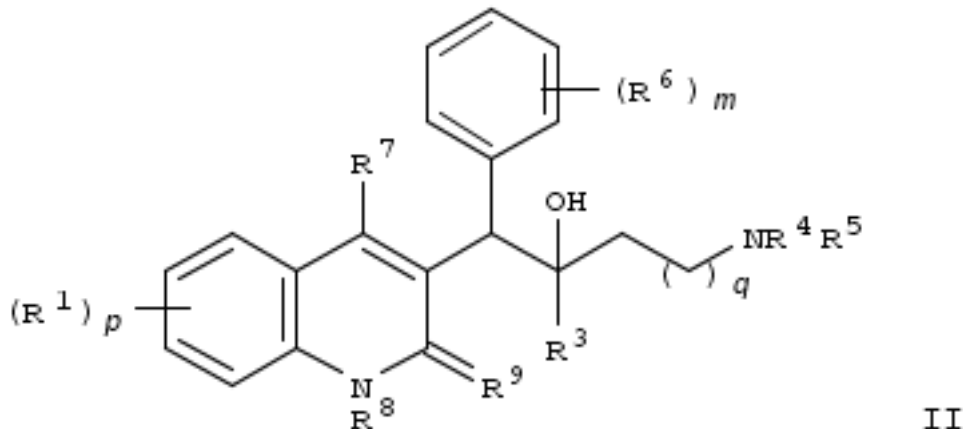

~25 Citings

Copyright © 2021 American Chemical Society (ACS). All Rights Reserved.

**5. Preparation of quinoline derivatives and their use as mycobacterial inhibitors**By Van Gestel, Jozef Frans Elisabetha; Guillemont, Jerome Emile Georges; Venet, Marc Gaston; Poignet, Herve Jean Joseph; Decrane, Laurence Francoise Bernadette; Vernier, Daniel F. J.; Odds, Frank Christopher  
From *U.S. Pat. Appl. Publ. (2005)*, [US 20050148581 A1 20050707](#), Language: English, Database: CAPLUS

The title compds. [I or II; R<sup>1</sup> = H, halo, haloalkyl, CN, etc.; p = 0-4; R<sup>2</sup> = H, OH, thio, alkoxy, etc.; R<sup>3</sup> = alkyl, aryl, aralkyl, heteroaryl, heteroarylalkyl; q = 0-4; R<sup>4</sup>, R<sup>5</sup> = H, alkyl, CH<sub>2</sub>Ph; or NR<sup>4</sup>R<sup>5</sup> = pyrrolidinyl, imidazolyl, triazolyl, etc.; R<sup>6</sup> = H, halo, haloalkyl, etc.; or two vicinal R<sup>6</sup> may be taken together to form CH:CHCH:CH; r = 0-5; R<sup>7</sup> = H, alkyl, aryl, heteroaryl; R<sup>8</sup> = H, alkyl; R<sup>9</sup> = oxo; or R<sup>8</sup> and R<sup>9</sup> together form NCH:CH] which are useful for the treatment of mycobacterial diseases, particularly those diseases caused by pathogenic mycobacteria such as Mycobacterium tuberculosis, M. bovis, M. avium and M. marinum, were prepd. In particular, compds. are claimed in which, independently from each other, R<sup>1</sup> = Br, p = 1, R<sup>2</sup> = alkyloxy, R<sup>3</sup> = (un)substituted naphthyl or Ph, q = 1, R<sup>4</sup> and R<sup>5</sup> each independently = H, Me or Et, R<sup>6</sup> = H, r = 0-1 and R<sup>7</sup> = H. E.g., a multi-step synthesis of III which showed MIC of 0.34 µg/mL and pIC<sub>50</sub> of 8.5 against M. tuberculosis and M. smegmatis, resp., was given. Also claimed is a compn. comprising a pharmaceutically acceptable carrier and, as active ingredient, a therapeutically effective amt. of the claimed compds. I, the use of the claimed compds. or compns. for the manuf. of a medicament for the treatment of mycobacterial diseases and a process for prepg. the claimed compds.

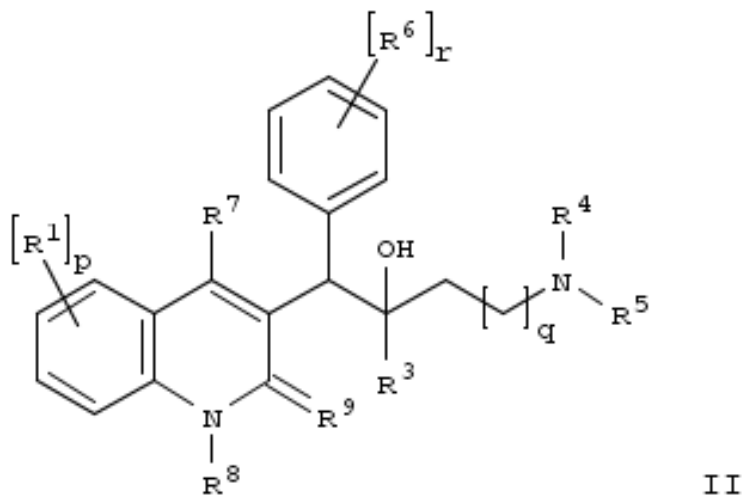

~12 Citings

Copyright © 2021 American Chemical Society (ACS). All Rights Reserved.

**6. Preparation of quinoline derivatives and their use as mycobacterial inhibitors**

By Guillemont, Jerome Emile Georges; Van Gestel, Jozef Frans Elisabetha; Venet, Marc Gaston; Poignet, Herve Jean Joseph; Decrane, Laurence Françoise Bernadette; Vernier, Daniel F. J.

From *PCT Int. Appl.* (2004), [WO 2004011436 A1](#) [20040205](#), Language: English, Database: CAPLUS

The title compds. [I or II; R<sup>1</sup> = H, halo, haloalkyl, CN, etc.; p = 0-4; R<sup>2</sup> = H, OH, thio, alkoxy, etc.; R<sup>3</sup> = alkyl, aryl, aralkyl, heteroaryl, heteroarylalkyl; q = 0-4; R<sup>4</sup>, R<sup>5</sup> = H, alkyl, CH<sub>2</sub>Ph; or NR<sup>4</sup>R<sup>5</sup> = pyrrolidinyl, imidazolyl, triazolyl, etc.; R<sup>6</sup> = H, halo, haloalkyl, etc.; or two vicinal R<sup>6</sup> may be taken together to form C:CC:C; r = 0-5; R<sup>7</sup> = H, alkyl, aryl, heteroaryl; R<sup>8</sup> = H, alkyl; R<sup>9</sup> = oxo; or R<sup>8</sup> and R<sup>9</sup> together form NCH:CH] which are useful for the treatment of mycobacterial diseases, particularly those diseases caused by pathogenic mycobacteria such as *Mycobacterium tuberculosis*, *M. bovis*, *M. avium* and *M. marinum*, were prepd. In particular, compds. are claimed in which, independently from each other, R<sup>1</sup> = Br, p = 1, R<sup>2</sup> = alkyloxy, R<sup>3</sup> = (un)substituted naphthyl or Ph, q = 1, R<sup>4</sup> and R<sup>5</sup> each independently = H, Me or Et, R<sup>6</sup> = H, r = 0-1 and R<sup>7</sup> = H. E.g., a multi-step synthesis of III which showed MIC of 0.34 µg/mL and pIC<sub>50</sub> of 8.5 against *M. tuberculosis* and *M. smegmatis*, resp., was given. Also claimed is a compn. comprising a pharmaceutically acceptable carrier and, as active ingredient, a therapeutically effective amt. of the claimed compds. I, the use of the claimed compds. or compns. for the manuf. of a medicament for the treatment of mycobacterial diseases and a process for prepg. the claimed compds.

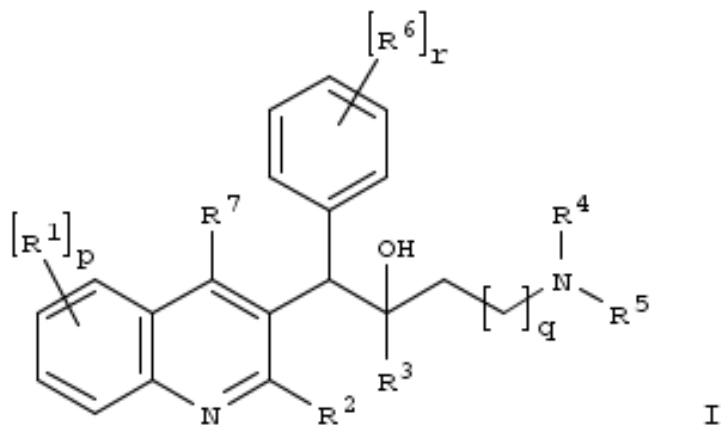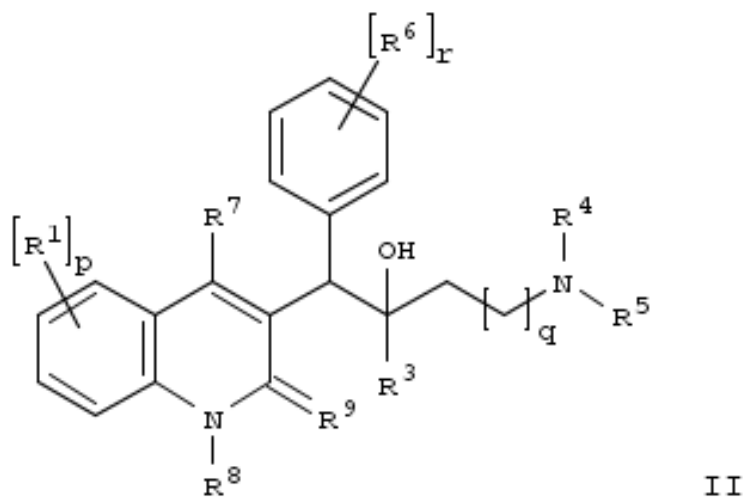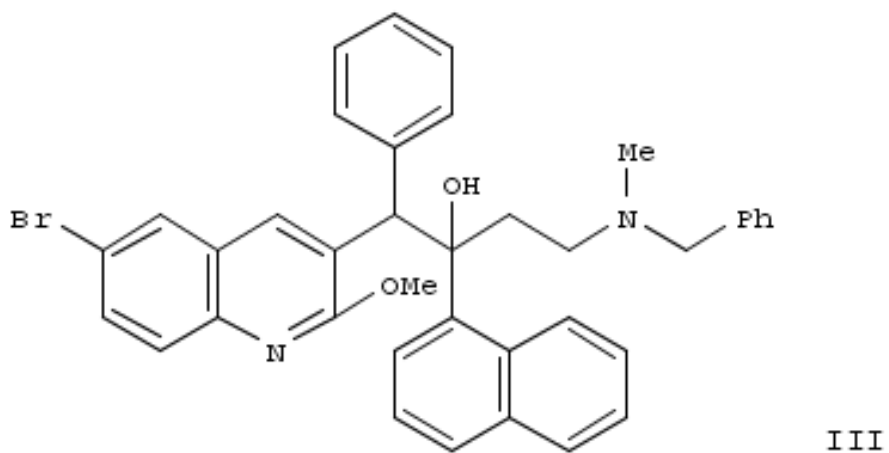

~58 Citings

### 1. Preparation of aminohydroxyphenylbutylquinolines as antibacterials.

By Andries, Koenraad Jozef Lodewijk Marcel; Koul, Anil; Guillemont, Jerome Emile Georges; Pasquier, Elisabeth Therese Jeanne; Lancois, David Francis Alain  
 From *PCT Int. Appl.* (2006), *WO 2006131519 A1 20061214*, Language: English, Database: CAPLUS

Use of title compds. [I; R<sup>1</sup> = H, halo, polyhaloalkyl, alkyl, hydroxyalkyl, alkoxy, Ar, Het; p, q = 1, 2; R<sup>2</sup> = alkoxy, alkoxyalkoxy, alkylthio; R<sup>3</sup> = alkyl, Ar, Het, Het1; R<sup>4</sup>, R<sup>5</sup> = H, alkyl, benzyl; R<sup>4</sup>R<sup>5</sup>N = (substituted) pyrrolidinyl, pyrrolinyl, pyrrolyl, imidazolidinyl, pyrazolidinyl, imidazolynyl, pyrazolynyl, imidazolyl, pyrazolyl, triazolyl, piperidinyl, pyridinyl, piperazinyl, pyridazinyl, pyrimidinyl, pyrazinyl, triazinyl, morpholinyl, thiomorpholinyl; R<sup>6</sup> = H, halo, polyhaloalkyl, alkyl, alkoxy, alkylthio; 2 vicinal R<sup>6</sup> may = CH:CHCH:CH; R<sup>7</sup> = H, alkyl, Ar, Het, Het1; Ar = (substituted) Ph, naphthyl, acenaphthyl, 1,2-dihydroacenaphthyl, tetrahydronaphthyl; Het = (substituted) piperidyl, pyrrolyl, N-phenoxy piperidyl, pyrazolyl, triazolyl, imidazolyl, furyl, pyridyl, pyrimidyl, pyrazinyl, etc.; Het1 = (substituted) quinolyl, quinoxalynyl, indolyl, benzimidazolyl, benzofuryl, benzothienyl, 2,3-dihydrobenzodioxinyl, etc.; with provisos], for manuf. of a medicament for treatment of bacterial infection is claimed. Thus, a diastereomer of title compd. (II) (prepn. outlined) showed an IC<sub>90</sub> = 10.8 µg/mL against *Streptococcus mutans* ATCC33402.

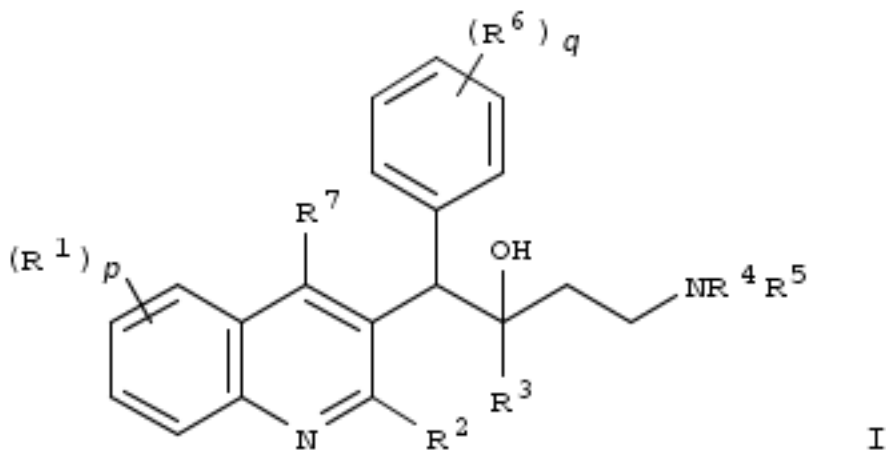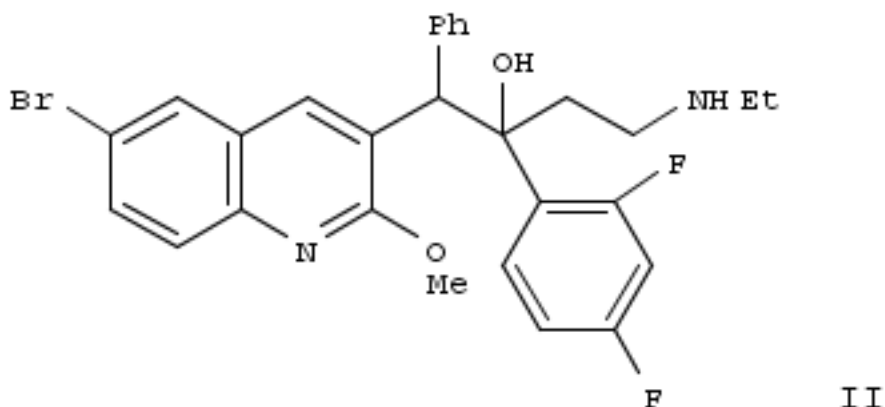

#### ~10 Citings

Copyright © 2021 American Chemical Society (ACS). All Rights Reserved.

### 2. Preparation of quinoline derivatives and their use as mycobacterial inhibitors

By Koul, Anil; Andries, Koenraad Jozef Lodewijk Marcel  
 From *Can. Pat. Appl.* (2006), *CA 2529265 A1 20060624*, Language: English, Database: CAPLUS



The title compds. [I or II; R<sup>1</sup> = H, halo, haloalkyl, CN, etc.; p = 0-4; R<sup>2</sup> = H, OH, thio, alkoxy, etc.; R<sup>3</sup> = alkyl, aryl, aralkyl, heteroaryl, heteroarylalkyl; q = 0-4; R<sup>4</sup>, R<sup>5</sup> = H, alkyl, CH<sub>2</sub>Ph; or NR<sup>4</sup>R<sup>5</sup> = pyrrolidinyl, imidazolyl, triazolyl, etc.; R<sup>6</sup> = H, halo, haloalkyl, etc.; or two vicinal R<sup>6</sup> may be taken together to form CH:CHCH:CH; r = 0-5; R<sup>7</sup> = H, alkyl, aryl, heteroaryl; R<sup>8</sup> = H, alkyl; R<sup>9</sup> = oxo; or R<sup>8</sup> and R<sup>9</sup> together form NCH:CH] which are useful for the treatment of mycobacterial diseases, particularly those diseases caused by pathogenic mycobacteria such as Mycobacterium tuberculosis, M. bovis, M. avium and M. marinum, were prepd. In particular, compds. are claimed in which, independently from each other, R<sup>1</sup> = Br, p = 1, R<sup>2</sup> = alkyloxy, R<sup>3</sup> = (un)substituted naphthyl or Ph, q = 1, R<sup>4</sup> and R<sup>5</sup> each independently = H, Me or Et, R<sup>6</sup> = H, r = 0-1 and R<sup>7</sup> = H. E.g., a multi-step synthesis of III which showed MIC of 0.34 μg/mL and pIC<sub>50</sub> of 8.5 against M. tuberculosis and M. smegmatis, resp., was given. Also claimed is a compn. comprising a pharmaceutically acceptable carrier and, as active ingredient, a therapeutically effective amt. of the claimed compds. I, the use of the claimed compds. or compns. for the manuf. of a medicament for the treatment of mycobacterial diseases and a process for prepg. the claimed compds.

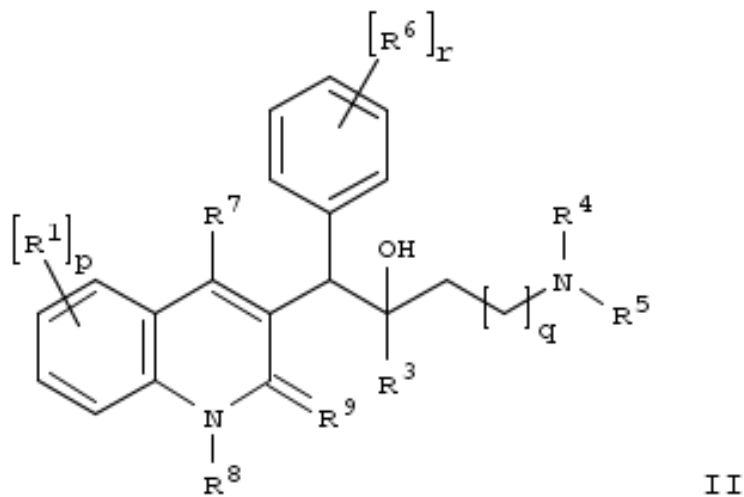

~12 Citings

Copyright © 2021 American Chemical Society (ACS). All Rights Reserved.

**3. Preparation of aminohydroxyaralkylquinolines for the treatment of drug resistant mycobacterial diseases**By Andries, Koenraad Jozef Lodewijk Marcel; Van Gestel, Jozef Frans Elisabetha  
From *PCT Int. Appl.* (2005), [WO 2005117875 A1 20051215](#), Language: English, Database: CAPLUS

Use of title compds. [I, II; R<sup>1</sup> = H, halo, haloalkyl, cyano, OH, aryl, heterocyclyl, alkyl, alkoxy, alkylthio, alkoxyalkyl, etc.; p = 1-4; R<sup>2</sup> = H, OH, SH, alkoxy, alkylthio, alkylamino, etc.; R<sup>3</sup> = alkyl, aryl, heterocyclyl, aralkyl, heterocyclylalkyl; q = 0-4; R<sup>4</sup>, R<sup>5</sup> = H, alkyl, PhCH<sub>2</sub>; R<sup>4</sup>R<sup>5</sup>N = (substituted) pyrrolidinyl, imidazolyl, morpholinyl, thiomorpholinyl, pyrazinyl, etc.; R<sup>6</sup> = H, halo, haloalkyl, OH, aryl, alkyl, alkoxy, alkylthio, aralkyl, etc.; 2 vicinal R<sup>6</sup> = CH:CHCH:CH; m = 1-5; R<sup>7</sup> = H, alkyl, aryl, heterocyclyl; R<sup>8</sup> = H, alkyl; R<sup>9</sup> = O; R<sup>8</sup>R<sup>9</sup> = NCH:CH] for prepn. of a medicament for treatment of an infection with a drug resistant Mycobacterium strain is claimed. Title compds. showed min. inhibitory concns. of 0.06-0.12 mg/L against isoniazid-resistant M. tuberculosis.

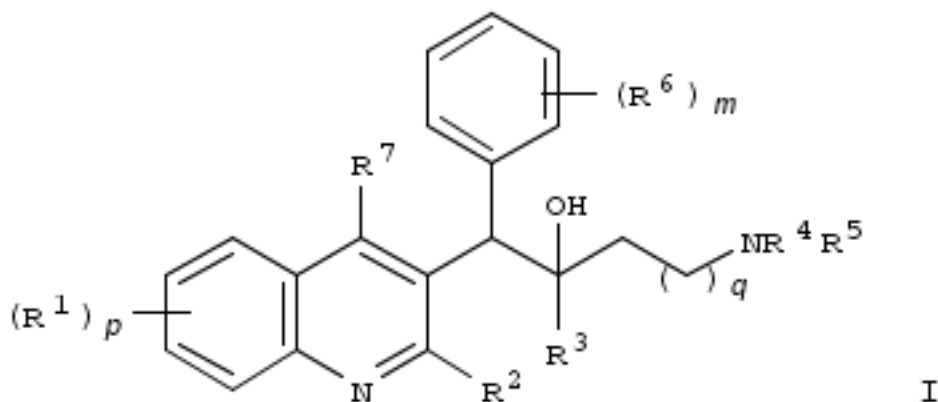

~25 Citings

Copyright © 2021 American Chemical Society (ACS). All Rights Reserved.

**4. Preparation of quinoline derivatives and their use as mycobacterial inhibitors**By Van Gestel, Jozef Frans Elisabetha; Guillemont, Jerome Emile Georges; Venet, Marc Gaston; Poignet, Herve Jean Joseph; Decrane, Laurence Françoise Bernadette; Vernier, Daniel F. J.; Odds, Frank Christopher  
From *U.S. Pat. Appl. Publ.* (2005), [US 20050148581 A1 20050707](#), Language: English, Database: CAPLUS

The title compds. [I or II; R<sup>1</sup> = H, halo, haloalkyl, CN, etc.; p = 0-4; R<sup>2</sup> = H, OH, thio, alkoxy, etc.; R<sup>3</sup> = alkyl, aryl, aralkyl, heteroaryl, heteroarylalkyl; q = 0-4; R<sup>4</sup>, R<sup>5</sup> = H, alkyl, CH<sub>2</sub>Ph; or NR<sup>4</sup>R<sup>5</sup> = pyrrolidinyl, imidazolyl, triazolyl, etc.; R<sup>6</sup> = H, halo, haloalkyl, etc.; or two vicinal R<sup>6</sup> may be taken together to form CH:CHCH:CH; r = 0-5; R<sup>7</sup> = H, alkyl, aryl, heteroaryl; R<sup>8</sup> = H, alkyl; R<sup>9</sup> = oxo; or R<sup>8</sup> and R<sup>9</sup> together form NCH:CH] which are useful for the treatment of mycobacterial diseases, particularly those diseases caused by pathogenic mycobacteria such as Mycobacterium tuberculosis, M. bovis, M. avium and M. marinum, were prepd. In particular, compds. are claimed in which, independently from each other, R<sup>1</sup> = Br, p = 1, R<sup>2</sup> = alkyloxy, R<sup>3</sup> = (un)substituted naphthyl or Ph, q = 1, R<sup>4</sup> and R<sup>5</sup> each independently = H, Me or Et, R<sup>6</sup> = H, r = 0-1 and R<sup>7</sup> = H. E.g., a multi-step synthesis of III which showed MIC of 0.34 μg/mL and pIC<sub>50</sub> of 8.5 against M. tuberculosis and M. smegmatis, resp., was given. Also claimed is a compn. comprising a pharmaceutically acceptable carrier and, as active ingredient, a therapeutically effective amt. of the claimed compds. I, the use of the claimed compds. or compns. for the manuf. of a medicament for the treatment of mycobacterial diseases and a process for prepg. the claimed compds.

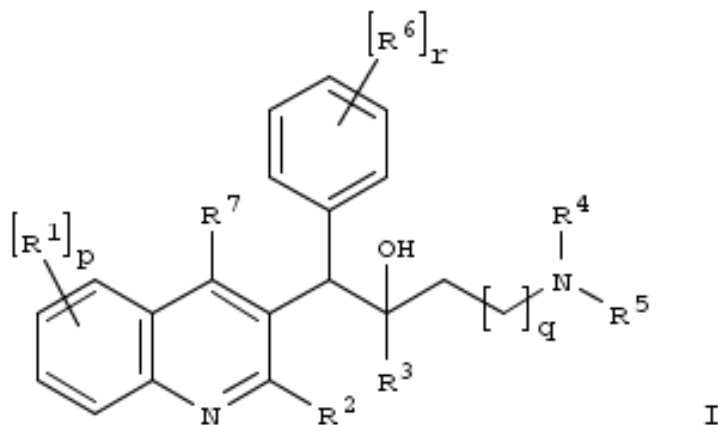

~12 Citings

Copyright © 2021 American Chemical Society (ACS). All Rights Reserved.

## 5. Preparation of quinoline derivatives and their use as mycobacterial inhibitors

By Guillemont, Jerome Emile Georges; Van Gestel, Jozef Frans Elisabetha; Venet, Marc Gaston; Poignet, Herve Jean Joseph; Decrane, Laurence Francoise Bernadette; Vernier, Daniel F. J.

From *PCT Int. Appl.* (2004), [WO 2004011436 A1 20040205](#), Language: English, Database: CAPLUS

The title compds. [I or II; R<sup>1</sup> = H, halo, haloalkyl, CN, etc.; p = 0-4; R<sup>2</sup> = H, OH, thio, alkoxy, etc.; R<sup>3</sup> = alkyl, aryl, aralkyl, heteroaryl, heteroarylalkyl; q = 0-4; R<sup>4</sup>, R<sup>5</sup> = H, alkyl, CH<sub>2</sub>Ph; or NR<sup>4</sup>R<sup>5</sup> = pyrrolidinyl, imidazolyl, triazolyl, etc.; R<sup>6</sup> = H, halo, haloalkyl, etc.; or two vicinal R<sup>6</sup> may be taken together to form C:CC:C; r = 0-5; R<sup>7</sup> = H, alkyl, aryl, heteroaryl; R<sup>8</sup> = H, alkyl; R<sup>9</sup> = oxo; or R<sup>8</sup> and R<sup>9</sup> together form NCH:CH] which are useful for the treatment of mycobacterial diseases, particularly those diseases caused by pathogenic mycobacteria such as *Mycobacterium tuberculosis*, *M. bovis*, *M. avium* and *M. marinum*, were prepd. In particular, compds. are claimed in which, independently from each other, R<sup>1</sup> = Br, p = 1, R<sup>2</sup> = alkyloxy, R<sup>3</sup> = (un)substituted naphthyl or Ph, q = 1, R<sup>4</sup> and R<sup>5</sup> each independently = H, Me or Et, R<sup>6</sup> = H, r = 0-1 and R<sup>7</sup> = H. E.g., a multi-step synthesis of III which showed MIC of 0.34 µg/mL and pIC<sub>50</sub> of 8.5 against *M. tuberculosis* and *M. smegmatis*, resp., was given. Also claimed is a compn. comprising a pharmaceutically acceptable carrier and, as active ingredient, a therapeutically effective amt. of the claimed compds. I, the use of the claimed compds. or compns. for the manuf. of a medicament for the treatment of mycobacterial diseases and a process for prepg. the claimed compds.

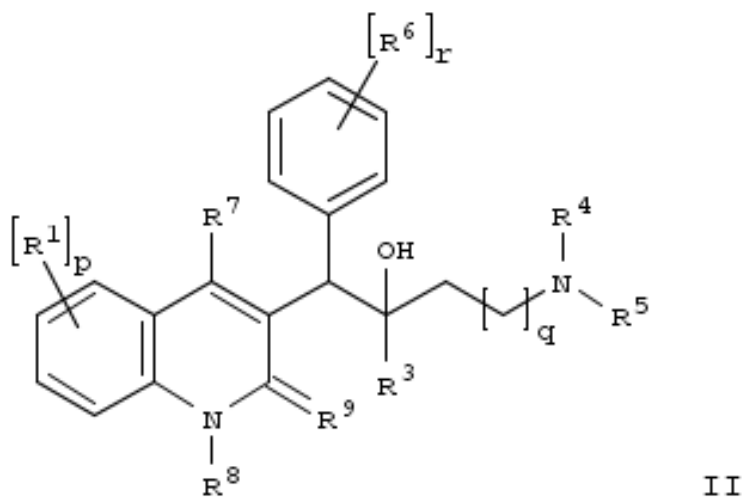

~58 Citings

## 1. Preparation of quinoline derivatives and their use as mycobacterial inhibitors

By Koul, Anil; Andries, Koenraad Jozef Lodewijk Marcel

From [Can. Pat. Appl. \(2006\), CA 2529265 A1 20060624](#), Language: English, Database: CAPLUS

The title compds. [I or II; R<sup>1</sup> = H, halo, haloalkyl, CN, etc.; p = 0-4; R<sup>2</sup> = H, OH, thio, alkoxy, etc.; R<sup>3</sup> = alkyl, aryl, aralkyl, heteroaryl, heteroarylalkyl; q = 0-4; R<sup>4</sup>, R<sup>5</sup> = H, alkyl, CH<sub>2</sub>Ph; or NR<sup>4</sup>R<sup>5</sup> = pyrrolidinyl, imidazolyl, triazolyl, etc.; R<sup>6</sup> = H, halo, haloalkyl, etc.; or two vicinal R<sup>6</sup> may be taken together to form CH:CHCH:CH; r = 0-5; R<sup>7</sup> = H, alkyl, aryl, heteroaryl; R<sup>8</sup> = H, alkyl; R<sup>9</sup> = oxo; or R<sup>8</sup> and R<sup>9</sup> together form NCH:CH] which are useful for the treatment of mycobacterial diseases, particularly those diseases caused by pathogenic mycobacteria such as *Mycobacterium tuberculosis*, *M. bovis*, *M. avium* and *M. marinum*, were prepd. In particular, compds. are claimed in which, independently from each other, R<sup>1</sup> = Br, p = 1, R<sup>2</sup> = alkyloxy, R<sup>3</sup> = (un)substituted naphthyl or Ph, q = 1, R<sup>4</sup> and R<sup>5</sup> each independently = H, Me or Et, R<sup>6</sup> = H, r = 0-1 and R<sup>7</sup> = H. E.g., a multi-step synthesis of III which showed MIC of 0.34 µg/mL and pIC<sub>50</sub> of 8.5 against *M. tuberculosis* and *M. smegmatis*, resp., was given. Also claimed is a compn. comprising a pharmaceutically acceptable carrier and, as active ingredient, a therapeutically effective amt. of the claimed compds. I, the use of the claimed compds. or compns. for the manuf. of a medicament for the treatment of mycobacterial diseases and a process for prepg. the claimed compds.

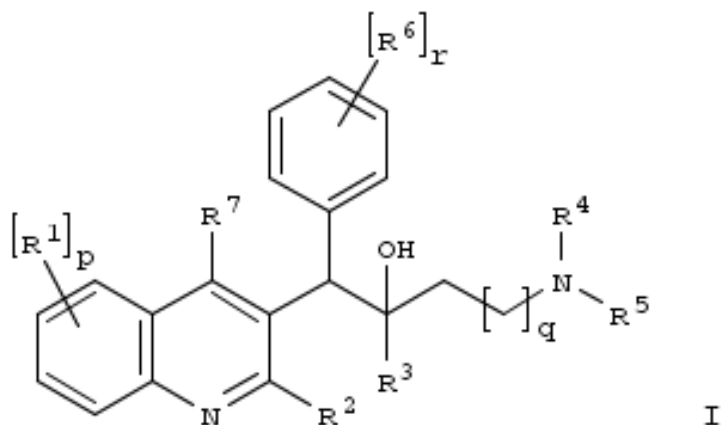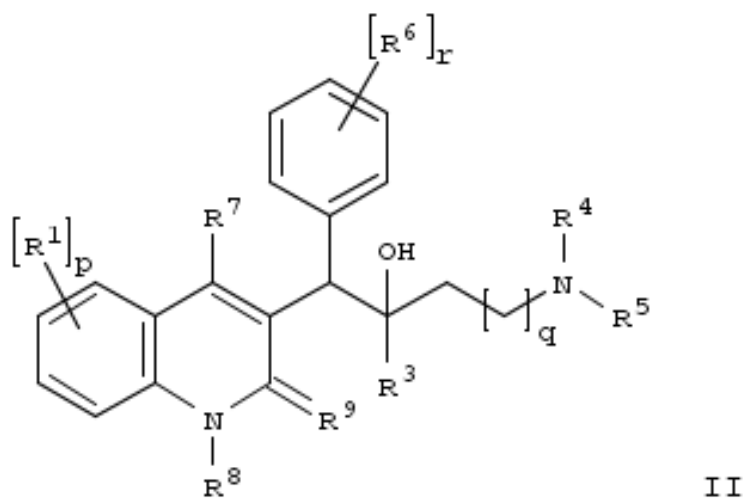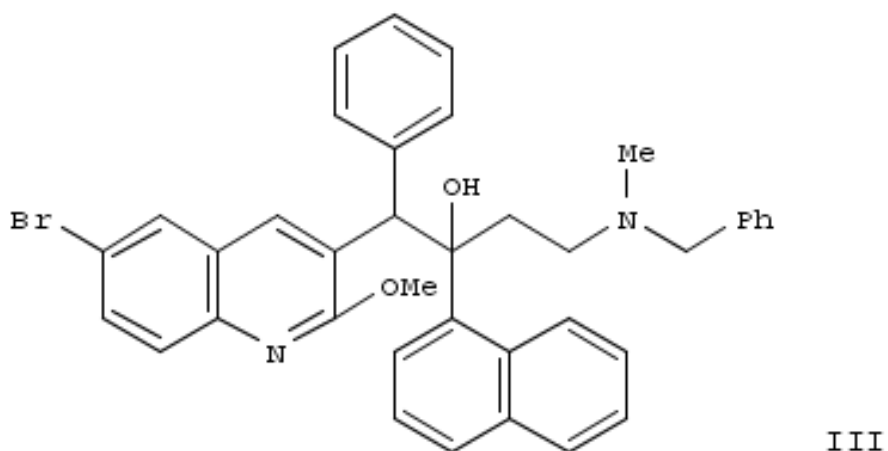

**~12 Citings**

Copyright © 2021 American Chemical Society (ACS). All Rights Reserved.

**2. Preparation of aminohydroxyaralkylquinolines for the treatment of drug resistant mycobacterial diseases**

By Andries, Koenraad Jozef Lodewijk Marcel; Van Gestel, Jozef Frans Elisabetha  
 From *PCT Int. Appl.* (2005), [WO 2005117875 A1](#) [20051215](#), Language: English, Database: CAPLUS

Use of title compds. [I, II; R<sup>1</sup> = H, halo, haloalkyl, cyano, OH, aryl, heterocyclyl, alkyl, alkoxy, alkylthio, alkoxyalkyl, etc.; p = 1-4; R<sup>2</sup> = H, OH, SH, alkoxy, alkylthio, alkylamino, etc.; R<sup>3</sup> = alkyl, aryl, heterocyclyl, aralkyl, heterocyclylalkyl; q = 0-4; R<sup>4</sup>, R<sup>5</sup> = H, alkyl, PhCH<sub>2</sub>; R<sup>4</sup>R<sup>5</sup>N = (substituted) pyrrolidinyl, imidazolyl, morpholinyl, thiomorpholinyl, pyrazinyl, etc.; R<sup>6</sup> = H, halo, haloalkyl, OH, aryl, alkyl, alkoxy, alkylthio, aralkyl, etc.; 2 vicinal R<sup>6</sup> = CH:CHCH:CH; m = 1-5; R<sup>7</sup> = H, alkyl, aryl, heterocyclyl; R<sup>8</sup> = H, alkyl; R<sup>9</sup> = O; R<sup>8</sup>R<sup>9</sup> = NCH:CH] for prepn. of a medicament for treatment of an infection with a drug resistant Mycobacterium strain is claimed. Title compds. showed min. inhibitory concns. of 0.06-0.12 mg/L against isoniazid-resistant M. tuberculosis.

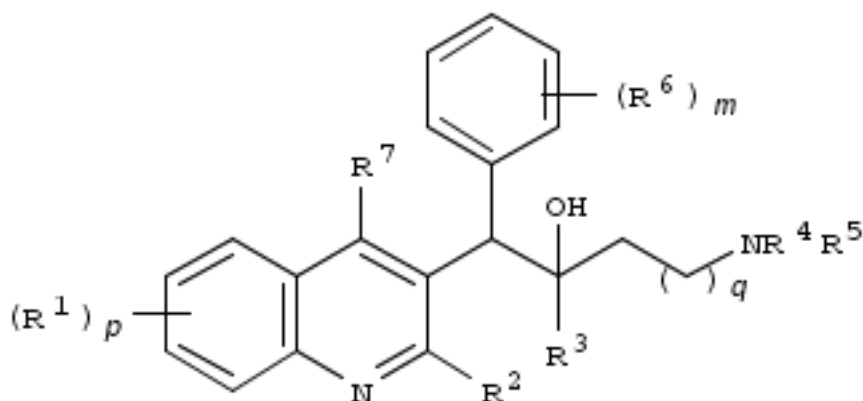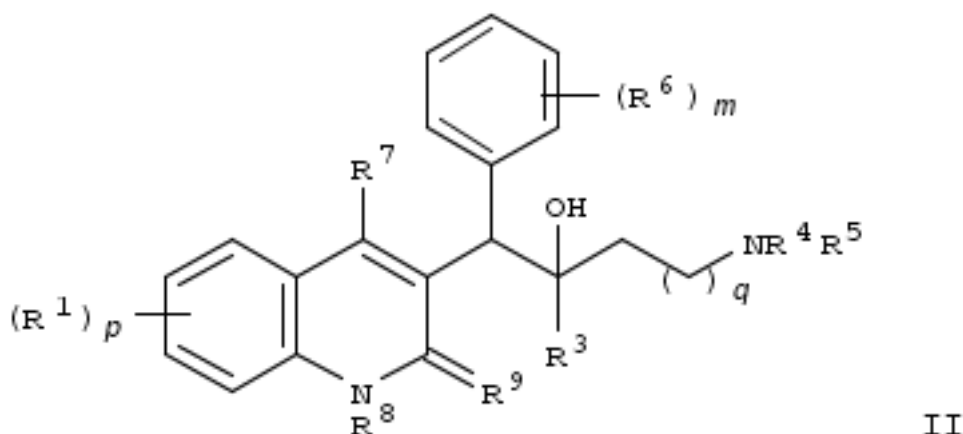

~25 Citings

Copyright © 2021 American Chemical Society (ACS). All Rights Reserved.

### 3. Preparation of quinoline derivatives and their use as mycobacterial inhibitors

By Van Gestel, Jozef Frans Elisabetha; Guillemont, Jerome Emile Georges; Venet, Marc Gaston; Poignet, Herve Jean Joseph; Decrane, Laurence Francoise Bernadette; Vernier, Daniel F. J.; Odds, Frank Christopher  
From [U.S. Pat. Appl. Publ. \(2005\), US 20050148581 A1 20050707](#), Language: English, Database: CAPLUS

The title compds. [I or II; R<sup>1</sup> = H, halo, haloalkyl, CN, etc.; p = 0-4; R<sup>2</sup> = H, OH, thio, alkoxy, etc.; R<sup>3</sup> = alkyl, aryl, aralkyl, heteroaryl, heteroarylalkyl; q = 0-4; R<sup>4</sup>, R<sup>5</sup> = H, alkyl, CH<sub>2</sub>Ph; or NR<sup>4</sup>R<sup>5</sup> = pyrrolidinyl, imidazolyl, triazolyl, etc.; R<sup>6</sup> = H, halo, haloalkyl, etc.; or two vicinal R<sup>6</sup> may be taken together to form CH:CHCH:CH; r = 0-5; R<sup>7</sup> = H, alkyl, aryl, heteroaryl; R<sup>8</sup> = H, alkyl; R<sup>9</sup> = oxo; or R<sup>8</sup> and R<sup>9</sup> together form NCH:CH] which are useful for the treatment of mycobacterial diseases, particularly those diseases caused by pathogenic mycobacteria such as Mycobacterium tuberculosis, M. bovis, M. avium and M. marinum, were prepd. In particular, compds. are claimed in which, independently from each other, R<sup>1</sup> = Br, p = 1, R<sup>2</sup> = alkyloxy, R<sup>3</sup> = (un)substituted naphthyl or Ph, q = 1, R<sup>4</sup> and R<sup>5</sup> each independently = H, Me or Et, R<sup>6</sup> = H, r = 0-1 and R<sup>7</sup> = H. E.g., a multi-step synthesis of III which showed MIC of 0.34 µg/mL and pIC<sub>50</sub> of 8.5 against M. tuberculosis and M. smegmatis, resp., was given. Also claimed is a compn. comprising a pharmaceutically acceptable carrier and, as active ingredient, a therapeutically effective amt. of the claimed compds. I, the use of the claimed compds. or compns. for the manuf. of a medicament for the treatment of mycobacterial diseases and a process for prepg. the claimed compds.





~12 Citings

Copyright © 2021 American Chemical Society (ACS). All Rights Reserved.

#### 4. Preparation of quinoline derivatives and their use as mycobacterial inhibitors

By Guillemont, Jerome Emile Georges; Van Gestel, Jozef Frans Elisabetha; Venet, Marc Gaston; Poignet, Herve Jean Joseph; Decrane, Laurence Francoise Bernadette; Vernier, Daniel F. J.  
 From [PCT Int. Appl. \(2004\), WO 2004011436 A1 20040205](#), Language: English, Database: CAPLUS

The title compds. [I or II; R<sup>1</sup> = H, halo, haloalkyl, CN, etc.; p = 0-4; R<sup>2</sup> = H, OH, thio, alkoxy, etc.; R<sup>3</sup> = alkyl, aryl, aralkyl, heteroaryl, heteroarylalkyl; q = 0-4; R<sup>4</sup>, R<sup>5</sup> = H, alkyl, CH<sub>2</sub>Ph; or NR<sup>4</sup>R<sup>5</sup> = pyrrolidinyl, imidazolyl, triazolyl, etc.; R<sup>6</sup> = H, halo, haloalkyl, etc.; or two vicinal R<sup>6</sup> may be taken together to form C:CC:C; r = 0-5; R<sup>7</sup> = H, alkyl, aryl, heteroaryl; R<sup>8</sup> = H, alkyl; R<sup>9</sup> = oxo; or R<sup>8</sup> and R<sup>9</sup> together form NCH:CH] which are useful for the treatment of mycobacterial diseases, particularly those diseases caused by pathogenic mycobacteria such as Mycobacterium tuberculosis, M. bovis, M. avium and M. marinum, were prepd. In particular, compds. are claimed in which, independently from each other, R<sup>1</sup> = Br, p = 1, R<sup>2</sup> = alkyloxy, R<sup>3</sup> = (un)substituted naphthyl or Ph, q = 1, R<sup>4</sup> and R<sup>5</sup> each independently = H, Me or Et, R<sup>6</sup> = H, r = 0-1 and R<sup>7</sup> = H. E.g., a multi-step synthesis of III which showed MIC of 0.34 µg/mL and pIC<sub>50</sub> of 8.5 against M. tuberculosis and M. smegmatis, resp., was given. Also claimed is a compn. comprising a pharmaceutically acceptable carrier and, as active ingredient, a therapeutically effective amt. of the claimed compds. I, the use of the claimed compds. or compns. for the manuf. of a medicament for the treatment of mycobacterial diseases and a process for prep. the claimed compds.

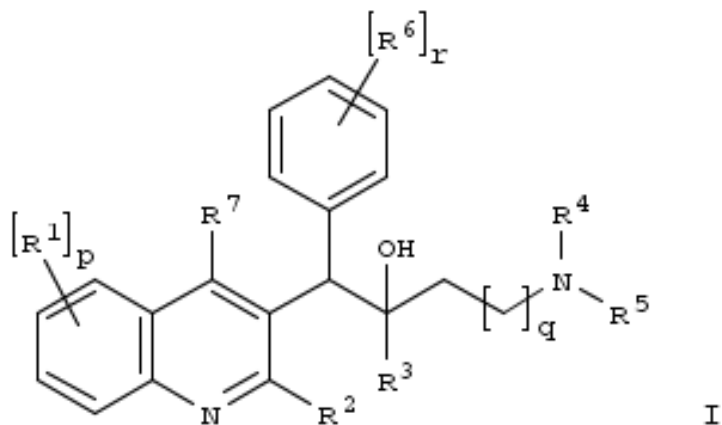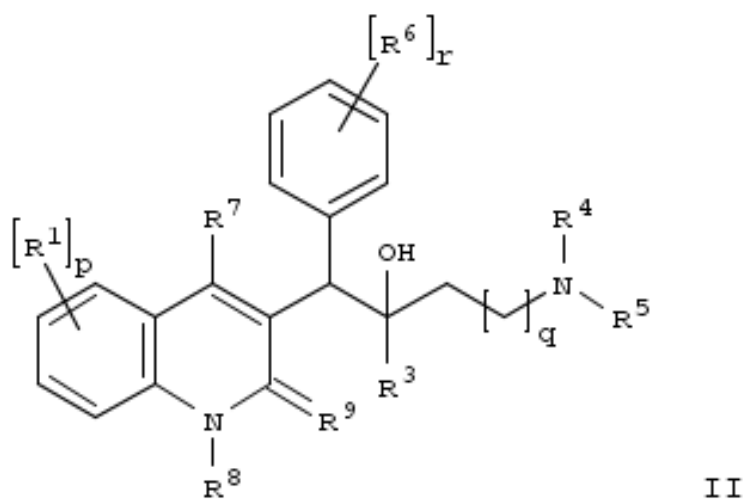

**~58 Citings**

Copyright © 2021 American Chemical Society (ACS). All Rights Reserved.

### 1. Rational drug design based synthesis of novel arylquinolines as anti-tuberculosis agents

By Jain, Puneet P.; Degani, Mariam S.; Raju, Archana; Ray, Mukhtikanta; Rajan, M. G. R.  
From *Bioorganic & Medicinal Chemistry Letters* (2013), 23(22), 6097-6105. Language: English, Database: CAPLUS,  
DOI:10.1016/j.bmcl.2013.09.027

A series of novel arylquinoline derivs. was designed retaining significant pharmacophoric features and three dimensional geometry of bedaquiline (I). In silico ADME study was performed to assess drug likeness and toxicity profiles of the designed mols. The compds. were evaluated for activity against Mycobacterium tuberculosis H<sub>37</sub>Rv using Resazurin Microtitre Assay (REMA) plate method and cytotoxicity in VERO C1008 cell line. Several of the synthesized compds. exhibited good antituberculosis activity and selectivity, esp. compds., II (R = H) (MIC: 5.18 μM and MIC/CC<sub>50</sub>: 152.86) and II (R = Cl) (MIC: 5.59 μM and MIC/CC<sub>50</sub>: 160.57). The study opens up a new platform for the development of arylquinoline based drugs for treating tuberculosis.

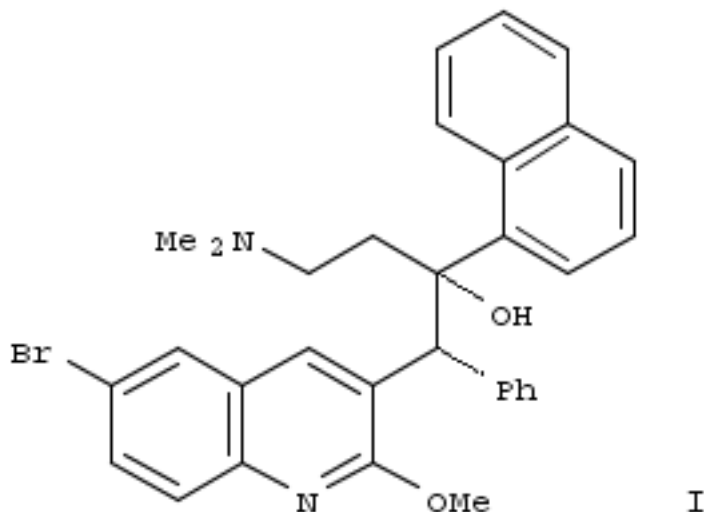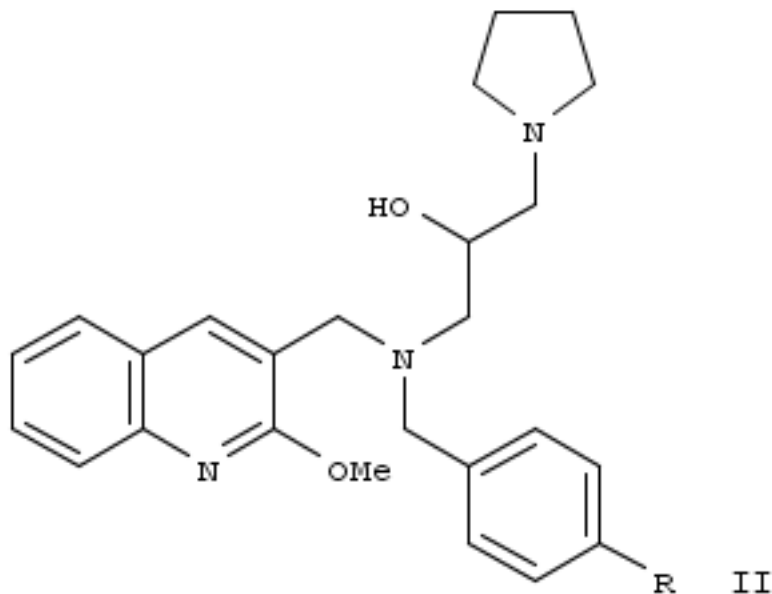

~18 Citings

Copyright © 2021 American Chemical Society (ACS). All Rights Reserved.
